1 **Deregulated mito-nuclear communication alters chromatin plasticity and differentiation**  
2 **potential of mesenchymal stem cells upon ageing**

3

4 Andromachi Pouikli<sup>1</sup>, Swati Parekh<sup>1</sup>, Monika Maleszewska<sup>1,#</sup>, Maarouf Baghdadi<sup>2</sup>, Ignacio  
5 Tripodi<sup>3,4</sup>, Chrysa Nikopoulou<sup>1</sup>, Kat Folz-Donahue<sup>5</sup>, Yvonne Hinze<sup>6</sup>, Andrea Mesaros<sup>7</sup>, Patrick  
6 Giavalisco<sup>6</sup>, Robin Dowell<sup>3,4,8</sup>, Linda Partridge<sup>2,9</sup> and Peter Tessarz<sup>1,9,10</sup>

7

8 1: Max-Planck Research Group “Chromatin and Ageing”, Max Planck Institute for Biology of  
9 Ageing, Joseph-Stelzmann-Str. 9b, 50931 Cologne, Germany

10 2: Dept. of Biological Mechanisms of Ageing, Max Planck Institute for Biology of Ageing,  
11 Joseph-Stelzmann-Str. 9b, 50931 Cologne, Germany

12 3: Computer Science, University of Colorado, Boulder, 1111 Engineering Dr., Boulder, CO  
13 80309, USA

14 4: BioFrontiers Institute, University of Colorado, Boulder, 3415 Colorado Ave., Boulder, CO,  
15 80303, USA

16 5: FACS and Imaging Core Facility, Max Planck Institute for Biology of Ageing, Joseph-  
17 Stelzmann-Str. 9b, 50931 Cologne, Germany

18 6: Metabolomics Core Facility, Max Planck Institute for Biology of Ageing, Joseph-Stelzmann-  
19 Str. 9b, 50931 Cologne, Germany

20 7: Phenotyping Core Facility, Max Planck Institute for Biology of Ageing, Joseph-Stelzmann-  
21 Str. 9b, 50931 Cologne, Germany

22 8: Molecular, Cellular & Developmental Biology, University of Colorado, Boulder, 1945  
23 Colorado Avenue, 347 UCB, Boulder, CO 80309, USA

24 9: Cologne Excellence Cluster on Stress Responses in ageing-associated Diseases  
25 (CECAD), Joseph-Stelzmann-Str. 26, 50931 Cologne, Germany

26 10: Correspondence to: [ptessarz@age.mpg.de](mailto:ptessarz@age.mpg.de)

27 # present address: Personalis, Inc., 1330 O'Brien Drive, Menlo Park, CA 94025, USA

28

29

30

31 **ABSTRACT**

32 Ageing is accompanied by a general decline in the function of many cellular pathways, with  
33 metabolic alterations, epigenetic modifications, and stem cell exhaustion representing three  
34 important hallmarks of the ageing process. However, whether these pathways are causally or  
35 functionally related at a molecular level remains poorly understood. Here, we use bone  
36 marrow-derived mesenchymal stem cells (MSCs) isolated from young and old mice to address  
37 how age-dependent changes in metabolism and epigenetics are linked and how they impact  
38 on the ageing transcriptome and differentiation potential. Given that MSCs maintain specific  
39 age-associated properties even under prolonged culture conditions, such as the age-  
40 dependent decrease in osteogenic differentiation, they are an excellent model to investigate  
41 *in vitro* the connection of ageing hallmarks on a mechanistic level. In this study, we  
42 demonstrate that upon ageing, osteogenic potential of MSCs declines as a consequence of  
43 deregulated mito-nuclear communication, mediated by decreased levels of the citrate carrier  
44 (CiC). Age-dependent down-regulation of CiC results in acetyl-CoA trapping within  
45 mitochondria, hypo-acetylation of histones and chromatin compaction. Together, these  
46 changes lead to an altered transcriptional output and are responsible for the reduced  
47 differentiation capacity into osteoblasts. Strikingly, short-term supplementation of aged cells  
48 with acetate, an exogenous source for cytosolic acetyl-CoA production, rescues not only the  
49 age-associated reduction of histone acetylation, but also the osteogenesis defect,  
50 representing a potential target for *in vitro* MSC rejuvenation.

51  
52  
53  
54  
55  
56  
57  
58  
59  
60

## 61 INTRODUCTION

62 Stem cell exhaustion, a result of reduced self-renewal capacity and imbalanced differentiation  
63 potential, is a well-established hallmark of the ageing process (López-Otín et al. 2013). Bone  
64 marrow mesenchymal stem cells (MSCs) have been shown to play an important role upon  
65 ageing due to their ability to regenerate bone by giving rise to adipocytes, chondrocytes and  
66 osteoblasts (Dominici et al. 2006; da Silva Meirelles, Caplan, and Nardi 2008; Caplan 2008).  
67 Aged MSCs show decreased capacity to differentiate into the osteogenic and chondrogenic  
68 lineages. This feature has been linked to increased fat content in the bone marrow upon  
69 ageing and concomitantly higher risk of osteoporosis and fractures (Kim et al. 2012; S. Zhou  
70 et al. 2008). This change in fate commitment is also known to occur in other stem cell  
71 populations upon ageing, such as hematopoietic stem cells, which show a biased  
72 differentiation potential towards the myeloid lineage (Akunuru and Geiger 2016).

73 Chromatin architecture influences stem cell fate decisions and cell differentiation is often  
74 accompanied by chromatin re-arrangements (Dixon et al. 2015). Research over the last few  
75 years has revealed that ageing manifests itself - among others - by changes in chromatin  
76 architecture and subsequently by alterations in gene expression across cell types and tissues  
77 (Benayoun, Pollina, and Brunet 2015; Booth and Brunet 2016). Thus, epigenetic changes are  
78 considered an important hallmark of the ageing process (López-Otín et al. 2013). Recently,  
79 partial reprogramming in various tissues was found to result in tissue regeneration and to  
80 prolong lifespan in premature ageing models (Ocampo et al. 2016), strongly suggesting that  
81 interfering with epigenetic mechanisms provides a way to intervene in the ageing process.

82 Metabolism has also been strongly implicated to contribute to the maintenance of stem cell  
83 states (Ito and Suda 2014). In this context, it is important to highlight that metabolism and  
84 chromatin are heavily intertwined (Kaelin and McKnight 2013; Lu and Thompson 2012; Reid,  
85 Dai, and Locasale 2017; Etchegaray and Mostoslavsky 2016). More precisely, intracellular  
86 metabolism provides metabolites that serve as essential cofactors and substrates for  
87 chromatin-modifying enzymes and their availability can strongly impact the activity of these  
88 enzymes. Many of these metabolites are generated within mitochondria and this establishes  
89 a tight mitochondrial-nuclear connection (Quirós, Mottis, and Auwerx 2016). For instance,  
90 during histone acetylation, histone acetyltransferases (HATs) transfer acetyl-groups from  
91 acetyl-CoA to lysine residues of histones. In mammals, most of the cytosolic acetyl-CoA is  
92 derived from the mitochondria-produced citrate, via a reaction catalysed by the enzyme ATP-  
93 citrate lyase (ACLY) (Srere 1959).

94 Like many adult stem cell populations, MSCs reside in niches characterised by low oxygen  
95 concentration (Ito and Suda 2014). In particular, the bone marrow niche was found to contain  
96 1.3-4.2% oxygen (Spencer et al. 2014). Thus, MSCs rely on anaerobic glycolysis for their  
97 energy production. However, glycolysis is not only the preferred metabolic pathway to produce

98 energy, but it has been also suggested to maintain MSCs in a multipotent state (Suda, Takubo,  
99 and Semenza 2011). On the contrary, increased mitochondrial respiration and oxidative  
100 phosphorylation (OXPHOS) have been demonstrated to occur during differentiation of MSCs  
101 and to facilitate lineage-specific commitment (Shyh-Chang, Daley, and Cantley 2013).  
102 Interestingly, MSCs purified from old individuals maintain specific, age-related properties,  
103 such as the decreased differentiation potential into the osteogenic lineage, even after  
104 prolonged culture *in vitro*, suggesting stable inheritance of epigenetic states. Thus, MSCs  
105 represent an ideal model to systematically study *in vitro* the age-related alterations in  
106 chromatin, metabolism and cell fate on a mechanistic level.  
107 In this study we demonstrate that osteogenesis defects observed in aged MSC originate from  
108 age-associated changes in the chromatin landscape. We show that upon ageing histone  
109 acetylation states are strongly impacted by an altered metabolic profile and we identify  
110 impaired acetyl-CoA export from mitochondria to the cytoplasm due to lower levels of citrate  
111 carrier as a critical component of this process. Impressively, circumventing defective acetyl-  
112 CoA export from mitochondria by supplementing medium of aged cells with acetate rescues  
113 loss of histone acetylation and the impaired osteogenic differentiation of aged MSCs.  
114 Collectively, our results establish a tight, age-dependent connection between metabolism,  
115 chromatin and stemness and identify citrate carrier as a critical mediator of mitochondrial-  
116 nuclear communication during ageing of MSCs.

117

## 118 **RESULTS**

### 119 **Aged MSCs exhibit low proliferation and differentiation capacity**

120 We isolated MSCs from the endosteum of young (~ 3-5 months old) and old (~ 18-22 months  
121 old) mice, following a published protocol outlined in Figure 1A (Houlihan et al. 2012). This  
122 strategy purifies a homogenous population of bone-marrow MSCs expressing high levels of  
123 Sca-1 and CD140a mesenchymal stem cell markers (Figure S1A, from here on referred to as  
124 MSCs). MSCs isolated using this protocol exhibit enhanced growth potential and robust tri-  
125 lineage differentiation capacity, compared to standard plastic adherence-selected MSCs. In  
126 addition, the selective isolation of MSCs based on specific surface markers avoids cellular  
127 contamination that could potentially interfere with downstream analysis (Houlihan et al. 2012).  
128 Furthermore, these MSCs have been shown to maintain their tri-lineage potential after  
129 transplantation, suggesting that they represent an excellent model to study MSC biology  
130 (Morikawa et al. 2009). Since only 500-1000 MSCs could be isolated per mouse following this  
131 procedure, we modified this protocol by adding the possibility for outgrowth of more MSCs  
132 from bones *in vitro*, before cell sorting, in order to acquire sufficient cells for biochemical  
133 assays (~40,000 cells per mouse). Taking into consideration the variability between individual  
134 mice, we pooled together cells obtained from three different animals, in each biological

135 replicate. Purified MSCs were characterized by the expression of mesenchymal stem cell  
 136 surface markers, while being devoid of hematopoietic markers (Figure S1A).  
 137

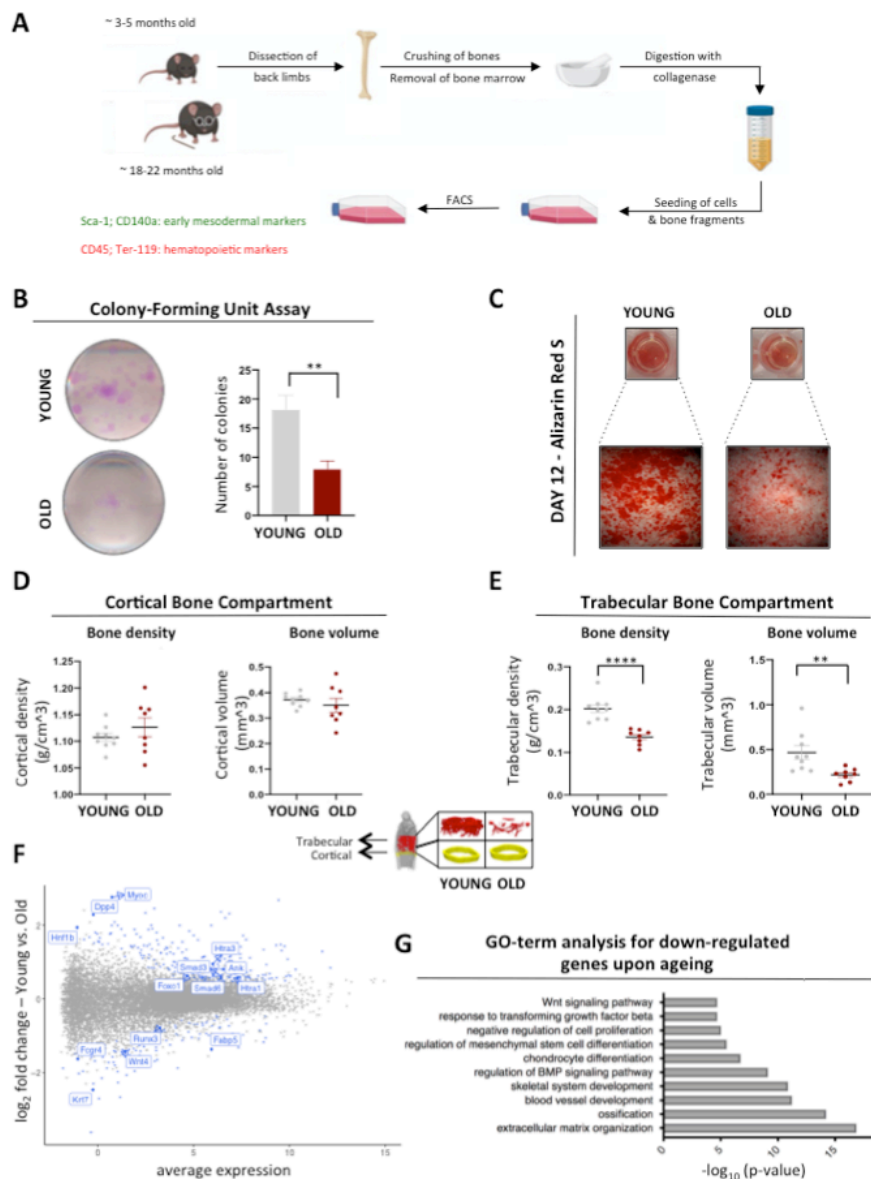

138

139 **Figure 1. MSCs lose their proliferation and differentiation potential upon ageing**  
 140 (A) Schematic representation demonstrating the isolation protocol of bone marrow Mesenchymal Stem  
 141 Cells (MSCs) from the back limbs of young (~3-5 months old) and old (~18-22 months old) mice. After  
 142 collection of the limbs, clean bones were cut into small pieces, which were then treated with collagenase  
 143 for 1h at 37°C. Cells and bone fragments were seeded on flasks and incubated for 10 days under 2%  
 144 O<sub>2</sub>. On day 10, we performed a cell sorting analysis using flow cytometry; we sorted for the CD45-/Ter-  
 145 119- double negative mesenchymal stem cells. (B) Representative images and quantification of Colony  
 146 Forming Unit assay for young and aged MSCs, after culturing them for 10-14 days; (n=3 biological  
 147 replicates for each age group). (C) Representative images of Alizarin-Red-S staining performed on  
 148 young and aged MSCs, 12 days after osteogenesis induction; (n=3 biological replicates for each age  
 149 group). Images were acquired using bright-field microscopy. (D and E) Measurement of bone density  
 150 and bone volume of the cortical and trabecular bone compartments from the femurs of young and old  
 151 animals; (n=9 biological replicates for young mice; n=8 biological replicates for old mice). (F and G)  
 152 MA-plot and GO-term analysis for down-regulated genes upon ageing, identified by RNA-seq. Data are  
 153 presented as mean ± SEM. Statistical significance was determined using student's t-Test; \*\*p-value <  
 154 0,01; \*\*\*\*p-value <0,0001. See also Figure S1.

155 We confirmed here that these cells showed three-lineage differentiation capacity, being able  
156 to give rise to adipocytes, chondrocytes and osteoblasts (Figure S1B-D), as has been  
157 previously reported for cells obtained using this protocol (Houlihan et al. 2012). This clearly  
158 demonstrates that our purification strategy enables successful isolation of multipotent MSCs.  
159 These cells were cultured exclusively under 2% oxygen, similar to the oxygen concentration  
160 found in their niche (Spencer et al. 2014).

161 One characteristic described for plastic-adherent MSCs is the loss of stemness when isolated  
162 from older individuals. To test whether our homogenous MSC's population shows the same  
163 phenotype, we performed proliferation and differentiation assays. Indeed, MSCs isolated from  
164 young mice produced more and bigger colonies in comparison to MSCs from old mice (Figure  
165 1B), indicating that the self-renewal ability was reduced upon stem cell ageing.

166 Next, we sought to investigate changes in the differentiation capacity of young and aged cells.  
167 While the adipogenic differentiation capacity was only mildly affected during ageing (Figure  
168 S1E), the ability of aged MSCs to differentiate into osteocytes was significantly decreased  
169 (Figure 1C). These observations prompted us to correlate our *in vitro* findings with potential *in*  
170 *vivo* changes in the bone quality upon ageing. Hence, we measured bone mineral density and  
171 bone volume in cortical and trabecular bone compartments of femurs from young and old mice.  
172 Interestingly, we observed decreased trabecular density and volume in old mice, whereas  
173 cortical density and volume remained unaffected during ageing (Figures 1D and 1E). To  
174 understand whether the observed changes in bone quality and stem cell potency were due to  
175 ageing-driven alterations in the transcriptional output, we performed RNA-sequencing  
176 (Figures 1F and 1G).

177 Interestingly, we found that Wnt4 and Runx3 genes were among the top down-regulated  
178 genes in aged cells; both genes have been reported to contribute significantly to stem cell  
179 potency because of their role in cell proliferation and osteogenesis, respectively (Saito et al.  
180 2015; Chang et al. 2007). On the other hand, Dpp4 was one of the most up-regulated genes  
181 in aged MSCs. This gene encodes a protease that has been recently shown to prevent bone  
182 regeneration, whereas inhibition of Dpp4 accelerates tibia fracture healing and increases the  
183 abundance of osteogenic progenitors (Ambrosi et al. 2017). Together, these results indicate  
184 that the age-related differentiation bias against osteogenic and chondrogenic lineages is fully  
185 supported by alterations in the transcriptional profile of aged MSCs.

186

### 187 **Chromatin re-arrangements in MSCs upon ageing**

188 Chromatin architecture plays a critical role in the regulation of gene transcription (B. Li, Carey,  
189 and Workman 2007). Therefore, we investigated whether age-associated alterations in the  
190 chromatin landscape were responsible for the transcriptional changes presented above. We

191 measured global chromatin accessibility by Assay for Transposase-Accessible Chromatin  
 192 using sequencing (ATAC-seq, Figure S2) (Buenrostro et al. 2013) on young and aged MSCs.  
 193

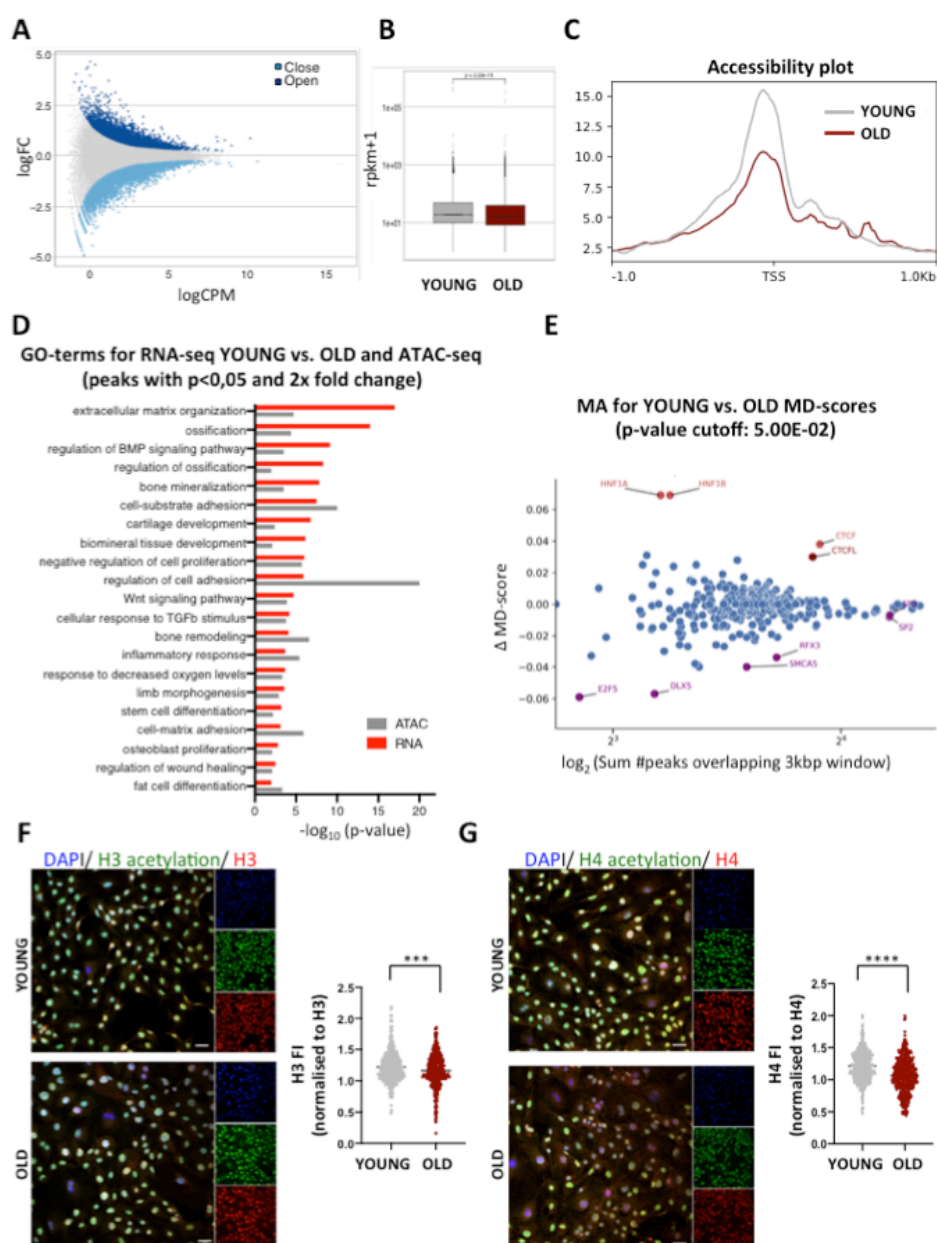

194  
 195 **Figure 2. Chromatin compaction and histone hypo-acetylation upon ageing**  
 196 (A) MA-plot showing opening and closing peaks with age as determined by ATAC-seq. (B) Overall  
 197 genome accessibility measured by ATAC-seq. (C) Metaplot of ATAC-seq reads over the transcription  
 198 start site (TSS) of all genes. (D) Common GO-terms that overlap in ATAC- and RNA-seq datasets were  
 199 determined using the Metascape algorithm. (E) DASTk analysis of the ATAC-seq data to predict  
 200 transcription factor activity. (F and G) Representative images and quantification after  
 201 immunofluorescence staining of young and aged cells, using antibodies against histone H3 acetylation  
 202 and H4 acetylation. Levels of Histone H3 and Histone H4 fluorescence intensity were used as an  
 203 internal control, respectively, for normalization. Nuclei were stained with DAPI. Scale bars, 75µm. Data  
 204 are presented as mean ± SEM. Statistical significance was determined using student's t-Test; \*\*\*p-  
 205 value < 0,001; \*\*\*\*p-value <0,0001. See also Figure S2.  
 206

207 This assay monitors chromatin accessibility on a genome-wide scale. We found that upon  
208 ageing 14750 sites in the genome changed significantly in accessibility status (FDR < 0.05);  
209 in particular, ~6500 sites became more accessible, while ~8250 sites became less accessible  
210 (Figure 2A). Surprisingly, we observed that global chromatin accessibility decreased  
211 significantly with age (Figure 2B). To further analyze differences in the chromatin structure,  
212 we plotted accessibility over the transcription start site (TSS) as a metaplot (Figure 2C). We  
213 observed that gene promoters in aged cells exhibited a strong decrease in chromatin  
214 accessibility. In order to understand if the observed chromatin changes could explain the  
215 changes in transcriptional output, we integrated the outcome of ATAC-seq and RNA-seq  
216 analysis using Metascape. Metascape allows for a global overview of the transcriptional  
217 activity by identifying common gene ontology (GO) enrichment, between ATAC-seq and RNA-  
218 seq datasets (Y. Zhou et al. 2019). Common GO- terms converged on cell proliferation and  
219 osteogenesis / bone regeneration processes (Figure 2D). Importantly, our data also suggested  
220 de-regulation of Wnt and BMP signaling, two pathways of critical importance for bone  
221 development (Deschaseaux, Sensébé, and Heymann 2009; Stewart et al. 2014).  
222 Finally, we used our ATAC-seq data to interrogate if specific transcription factors were  
223 responsible for the observed chromatin re-arrangements. To answer this question, we applied  
224 the Differential ATAC-seq toolkit (DAStk) (Tripodi, Allen, and Dowell 2018) on our ATAC-seq  
225 dataset. This approach uses ATAC-seq datasets to predict transcription factor activity. DAStk  
226 analysis identified several transcription factors and chromatin remodelers that could have  
227 contributed to the accessibility changes observed by ATAC-seq (Figure 2E).  
228 The most significant hit was CTCF, which was predicted to be more active in the aged cells.  
229 By contrast, higher activity of the Dlx5 and E2F5 transcription factors was implicated in young  
230 cells. These transcription factors are involved in cell proliferation and osteogenesis,  
231 respectively, and correlate with the observed age-related effects on proliferation ability and  
232 osteogenic differentiation capacity (Figures 1B and 1C). In addition to transcription factors,  
233 modifications on DNA and histones shape chromatin states. In particular, histone acetylation  
234 neutralizes the positive charge of the lysine side-chains of histones, weakening the contact  
235 between histones and DNA (Tessarz and Kouzarides 2014). We thus investigated if alterations  
236 in histone acetylation profiles also contributed to changes in chromatin accessibility. In line  
237 with the overall age-associated chromatin compaction, we observed significantly decreased  
238 levels of histone H3 and histone H4 acetylation in MSCs from old mice (Figures 2F and 2G).  
239 Together, our ATAC-seq data and immunofluorescence results suggest that ageing is  
240 accompanied by histone hypo-acetylation, concomitantly with a decrease in chromatin  
241 accessibility and transcriptional changes that are responsible for the lower proliferation and  
242 differentiation capacity of aged MSCs.



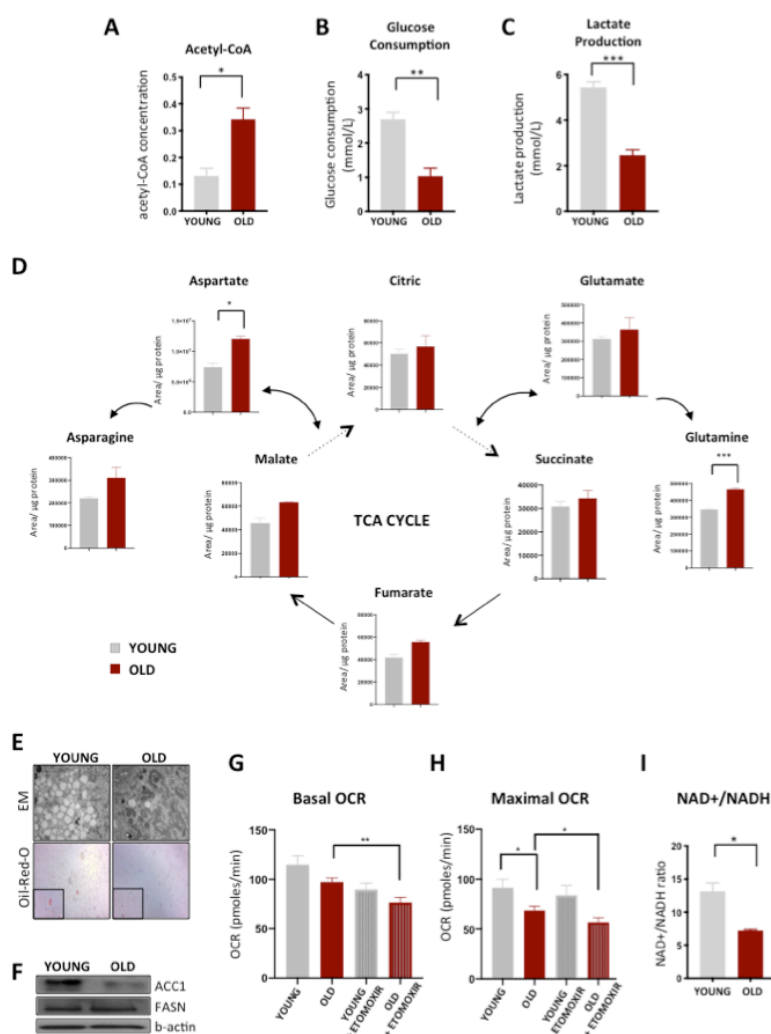

243

244 **Figure 3. Aged MSCs down-regulate glycolysis and up-regulate  $\beta$ -oxidation of fatty acids**  
 245 **(A)** Measurement of acetyl-CoA levels in young and aged MSCs using Mass Spectrometry analysis;  
 246 (n=3 biological replicates for each age group). **(B and C)** Glucose consumption and Lactate production  
 247 measured in the a-MEM media of young and aged cells using the Vi-Cell MetaFLEX instrument;  
 248 (n=3 biological replicates for each age group). **(D)** Metabolomic analysis of TCA-cycle intermediates and  
 249 TCA-cycle related amino acids by Mass Spectrometry; (n=3 biological replicates for young mice; n=2  
 250 biological replicates for old mice). **(E)** Representative images of lipid droplets in young and aged cells.  
 251 Images were acquired by electron microscopy (top) and by bright-field microscopy, after staining of the  
 252 neutral lipids with Oil-Red-O (bottom); (n=3 biological replicates for each age group). **(F)** Representative  
 253 immunoblots for ACC1 and FASN proteins.  $\beta$ -actin was used as a loading control (n=2 for each age  
 254 group). **(G and H)** Basal and Maximal Oxygen Consumption Rates (OCR) in young and aged MSCs,  
 255 treated with or without 100 $\mu$ M Etomoxir for 1hr, prior to the assay. Measurements were made using the  
 256 Seahorse XF24 extracellular flux analyzer instrument; (n=3 biological replicates for each age group).  
 257 **(I)** Metabolomic analysis of NAD<sup>+</sup>/NADH levels using Mass Spectrometry and graph of their ratio (n=3  
 258 biological replicates for each age group). Data are presented as mean  $\pm$  SEM. Statistical significance  
 259 was determined using student's t-Test; \*p-value < 0,05; \*\*p-value < 0,01; \*\*\* p-value <0,001. See also  
 260 Figure S3.  
 261

262 **Aged MSCs switch from glycolysis to fatty acid oxidation as an energy source**  
 263 Our findings regarding age-associated decrease in the levels of histone acetylation (Figures  
 264 2F and 2G) prompted us to investigate how histone acetylation profile was established in  
 265 young and aged MSCs and whether other cellular processes were involved in this phenotype.

266 In particular, we focused on metabolism, because metabolic pathways can directly impact  
267 DNA and histone modifications (Kaelin and McKnight 2013; Lu and Thompson 2012; Reid,  
268 Dai, and Locasale 2017; Etchegaray and Mostoslavsky 2016). For instance, local availability  
269 of acetyl-CoA directly influences levels of histone acetylation (Wellen et al. 2009; Cai et al.  
270 2011).

271 Therefore, we measured acetyl-CoA concentration in young and aged MSCs and observed a  
272 strong increase in acetyl-CoA levels in aged MSCs (Figure 3A). This result was unexpected  
273 and in contradiction to the histone hypo-acetylation observed in MSCs from old mice. Thus,  
274 we were motivated to investigate the source of the acetyl-CoA increase. Given that in MSCs  
275 anaerobic glycolysis is the main energy source and that a direct connection between histone  
276 acetylation and glycolytic rate has been previously described (Cluntun et al. 2015), we first  
277 investigated ageing-driven changes in glycolysis. We measured glucose uptake and lactate  
278 secretion as a proxy for the glycolytic flux (TeSlaa and Teitell 2014). We found that MSCs  
279 derived from young mice consumed glucose and concomitantly secreted lactate (Figures 3B  
280 and 3C). However, MSCs purified from old mice displayed lower glucose uptake and  
281 subsequently lower lactate secretion and higher pH in their media (Figures 3B and 3C; Figure  
282 S3A), indicating that MSCs from old mice performed glycolysis to a lower extent than the  
283 young MSCs. Due to changes in the metabolic profile of aged MSCs, we next sought to further  
284 metabolically characterize MSCs upon ageing and we focused on mitochondrial metabolism;  
285 we monitored changes in the mitochondrial networks by observing cells under the electron  
286 microscope and also after staining them with TOMM20. Both experimental approaches  
287 revealed that aged cells contained fragmented mitochondria, which formed less complex and  
288 less tubular networks (Figure S3B), a phenotype which has been described for several cell  
289 types upon ageing (Sharma et al. 2019). However, we found that although ageing affects  
290 mitochondrial structure, it doesn't have an impact on mitochondrial DNA content and  
291 mitochondrial mass (Figures S3C and S3D). To test whether the age-associated alterations  
292 in mitochondrial morphology are accompanied by changes in mitochondrial function we  
293 performed targeted metabolomics. Interestingly, we observed that many TCA cycle  
294 intermediates and TCA cycle-related amino acids were slightly enriched in aged cells (Figure  
295 3D). This establishes a trend towards more TCA cycle intermediates in aged cells, suggesting  
296 an ageing-driven rewiring of the Krebs cycle which results in higher production and/or lower  
297 consumption of the intermediate metabolites.

298 Finally, we investigated lipid metabolism and fatty acid oxidation (FAO) as a potential source  
299 for the higher acetyl-CoA levels upon ageing. Surprisingly, both by electron microscopy and  
300 after Oil-Red-O staining of neutral lipids, we observed that aged cells contained fewer lipid  
301 droplets than young cells (Figure 3E). Lipid droplets are the intracellular storage sites of

302 neutral lipids (Walther and Farese 2012; Brasaemle 2007; Bickel, Tansey, and Welte 2009)  
303 and tend to accumulate in cells that do not use fatty acids to produce energy. The finding that  
304 aged cells contained fewer lipid droplets could be explained either by lower fatty acid  
305 biosynthesis or by increased lipid droplet consumption and thus higher FAO. Interestingly,  
306 although FASN protein levels did not change upon ageing, protein levels of the ACC1 enzyme,  
307 which is important for the initiation of the fatty acid biosynthesis program, were strongly  
308 decreased in aged cells (Figure 3F). These results pointed towards impaired lipogenesis upon  
309 ageing. In parallel, we measured oxygen consumption rate (OCR) in young and aged control  
310 cells as well as after treatment with etomoxir. Etomoxir inhibits the CPT-1 enzyme and blocks  
311 FAO. Although etomoxir treatment of young cells only slightly decreased basal and maximal  
312 OCR, both basal and maximal OCR were significantly decreased upon etomoxir treatment in  
313 aged MSCs (Figure 3G and 3H), suggesting that aged cells up-regulate FAO to produce  
314 energy. Such a metabolic switch should be also reflected in the NAD<sup>+</sup>/NADH ratio. Indeed,  
315 we found that the NAD<sup>+</sup>/NADH ratio declined with age (Figure 3I). Together, our results  
316 demonstrate that during ageing, MSCs undergo a metabolic shift from glycolysis towards FAO,  
317 which together with the impaired fatty acid biosynthesis are responsible for the elevated acetyl-  
318 CoA levels. To further validate that the higher acetyl-CoA in the aged cells is indeed a result  
319 of its lower consumption during lipogenesis and its higher production during FAO, we focused  
320 on the different pathways through which acetyl-CoA is generated (Figure S3E). We compared  
321 ACLY and AceSC1 protein levels between young and aged cells, in order to investigate  
322 whether the different levels of acetyl-CoA are due to differential regulation of these enzymes.  
323 Both ACLY and AceCS1 levels were unaffected during ageing (Figure S3F), indicating that  
324 the conversion of citrate and acetate in the cytoplasm are not responsible for the observed  
325 changes in the acetyl-CoA levels. Therefore, the age-dependent metabolic alterations  
326 described above explain the observed increase in acetyl-CoA levels. However, they do not  
327 explain the apparent contradiction to the histone hypo-acetylation.

### 328 **Citrate carrier links mitochondrial acetyl-CoA pool with histone acetylation and** 329 **stemness of MSCs upon ageing**

330 As discussed above, histone acetylation relies on the local availability of acetyl-CoA (Wellen  
331 et al. 2009; Cai et al. 2011). Since aged cells contain higher levels of acetyl-CoA, one likely  
332 explanation for the reduced histone acetylation upon ageing could be the differential  
333 expression of histone acetyl-transferases (HATs). However, protein levels of CBP, which is a  
334 major HAT, remain unaffected upon ageing (Figure S4A). Given that the majority of acetyl-  
335 CoA is generated inside mitochondria as part of the TCA cycle, we speculated that the  
336 discrepancy between acetyl-CoA and histone acetylation levels might be due to decreased  
337 export of acetyl-CoA from the mitochondria to the cytoplasm. To test this hypothesis, we took

338 into consideration the fact that inside mitochondria proteins are acetylated in a non-enzymatic  
 339 manner, when acetyl-CoA levels are high (Hong et al. 2016; James et al. 2017).

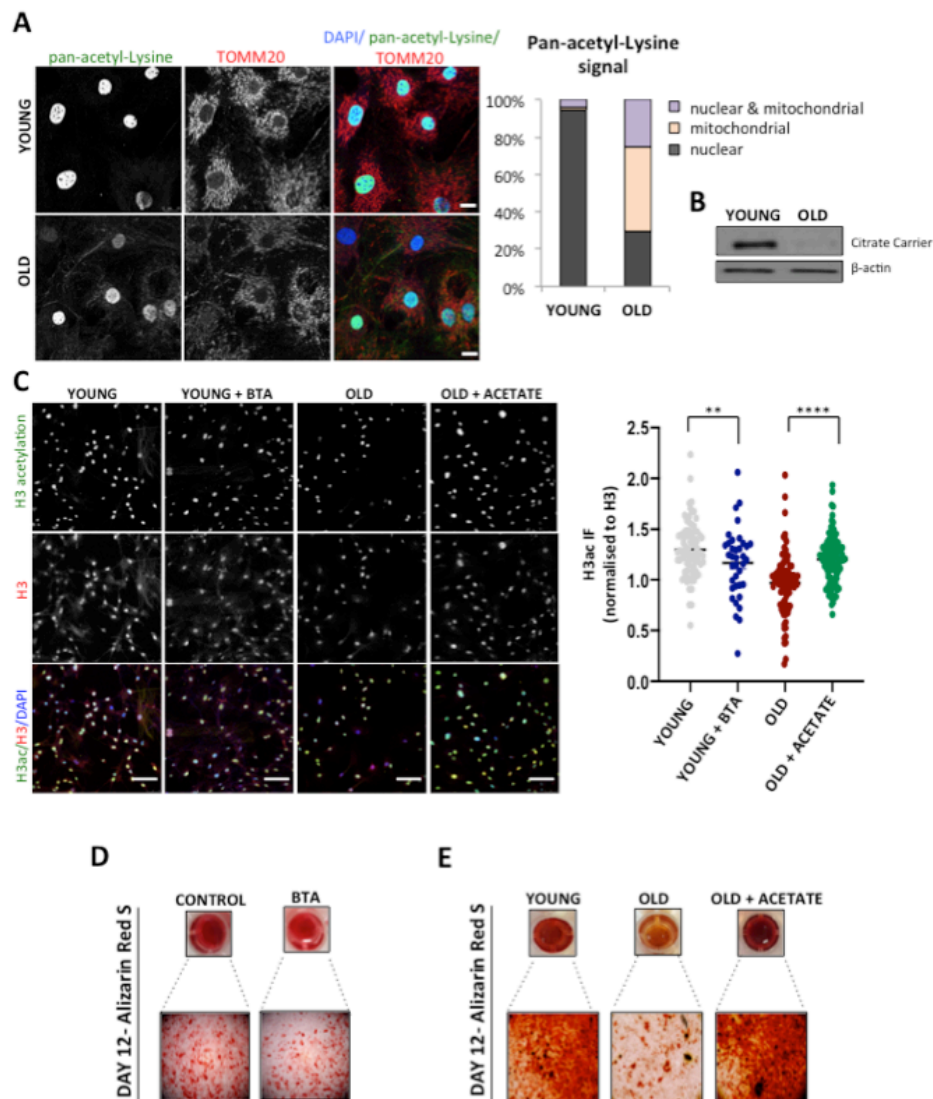

340

341 **Figure 4. Citrate carrier links acetyl-CoA to histone acetylation and stemness upon ageing**  
 342 **(A)** Representative images of young and aged MSCs after immunofluorescence staining, using pan-  
 343 acetyl-Lysine and TOMM20 antibodies (left). Quantification of the localization of pan-acetyl-Lysine  
 344 signal (right). Nuclei were stained with DAPI. Scale bars, 10µm. **(B)** Representative immunoblots for  
 345 the citrate carrier protein in young and aged MSCs. β- was used as a loading control; (n=3 for each age  
 346 group). **(C)** Representative images and quantification after immunofluorescence staining of young cells  
 347 treated with or without 1mM BTA for 3 days, using antibodies against histone H3 acetylation and of  
 348 aged cells treated with or without 5mM sodium acetate for 3 days. Levels of Histone H3 fluorescence  
 349 intensity were used as an internal control, for normalization. Nuclei were stained with DAPI. Scale bars,  
 350 75µm. **(D)** Representative images of Alizarin-Red-S staining performed on young MSCs, 12 days after  
 351 induction of osteogenesis. Cells were treated with or without 1mM BTA during the osteogenesis period;  
 352 (n=3 biological replicates for each group). **(E)** Representative images of Alizarin-Red-S staining  
 353 performed on young and aged MSCs, 12 days after induction of osteogenesis. Cells were treated with  
 354 or without 5mM acetate for 3 days, before the induction of osteogenesis; (n=3 biological replicates for  
 355 each group). Images were acquired using bright-field microscopy. Data are presented as mean ± SEM.  
 356 Statistical significance was determined using student's t-Test; \*\*\*\* p-value <0,001. See also Figure S4.

357 We thus performed an immunofluorescence experiment and stained young and aged cells  
358 using an antibody against pan-acetyl-lysine, whereas TOMM20 was used as a counterstain  
359 for mitochondria. We observed a strong, age-dependent change in the localization of lysine  
360 acetylation signal, shifting from nuclear to mitochondrial upon ageing (Figure 4A).

361 This suggests that acetyl-CoA is trapped inside the mitochondria of aged cells. To explain why  
362 aged cells showed such a compartmentalized localization of acetyl-CoA, we focused on the  
363 protein responsible for acetyl-CoA export. Citrate carrier (CiC) resides in the inner  
364 mitochondrial membrane and functions as an antiporter; it imports malate from the cytosol into  
365 mitochondria and exports citrate from mitochondria to the cytosol (Gnoni et al. 2009). In the  
366 cytosol, citrate is converted into acetyl-CoA by ACLY enzyme. Importantly, a connection  
367 between citrate carrier and histone acetylation has been demonstrated in *D. melanogaster*  
368 and in primary human fibroblasts (Morciano et al. 2009). Taking this into account, we  
369 speculated that down-regulation of CiC during ageing might result in lower cytoplasmic/nuclear  
370 levels of acetyl-CoA, explaining the observed decrease in histone acetylation. To address this  
371 possibility, we compared CiC mRNA and protein levels between young and aged MSCs.  
372 Strikingly, although mRNA levels of the *Slc25a1* gene which encodes the citrate carrier were  
373 only slightly affected upon ageing (Figure S4B), CiC protein levels were dramatically  
374 decreased in aged cells (Figure 4B), confirming our hypothesis that MSCs from old mice  
375 display impaired export of acetyl-CoA from mitochondria to the cytosol.

376 Next, we critically tested whether CiC was indeed the mechanistic target linking mitochondrial  
377 acetyl-CoA to histone acetylation in aged cells. Since the extremely limited amount of purified  
378 MSCs does not allow us to perform transfection-based studies, we further assessed the CiC-  
379 histone acetylation connection using two independent approaches. On one hand, we used  
380 1,2,3-benzene-tricarboxylic acid (BTA), a specific inhibitor of the citrate transporter (Kolukula  
381 et al. 2014; Hlouschek et al. 2018), to treat young cells. After three days of treatment, we  
382 analyzed levels of histone H3 acetylation by immunofluorescence, as described above.  
383 Inhibition of CiC activity in young cells decreased levels of histone acetylation (Figure 4C),  
384 mimicking the results observed in aged MSCs. In a complementary approach, we added  
385 sodium acetate directly to the media of aged cells. Acetate represents an exogenous source  
386 of acetyl-CoA and can be converted into acetyl-CoA in the cytoplasm by AceCS1 enzyme  
387 (Moussaieff et al. 2015). This treatment would circumvent the impaired acetyl-CoA export from  
388 mitochondria to the cytosol. Notably, as shown in Figure S3F, AceCS1 levels were comparable  
389 between young and aged cells. Surprisingly, supplementation of aged cells with sodium  
390 acetate for three days rescued the loss of histone acetylation observed in the aged cells, to  
391 levels similar to those of young cells (Figure 4C). Collectively, these data demonstrate that

392 loss of citrate carrier upon ageing is responsible for the reduction of histone acetylation levels,  
393 providing a mechanistic link between intermediate metabolism and histone acetylation.

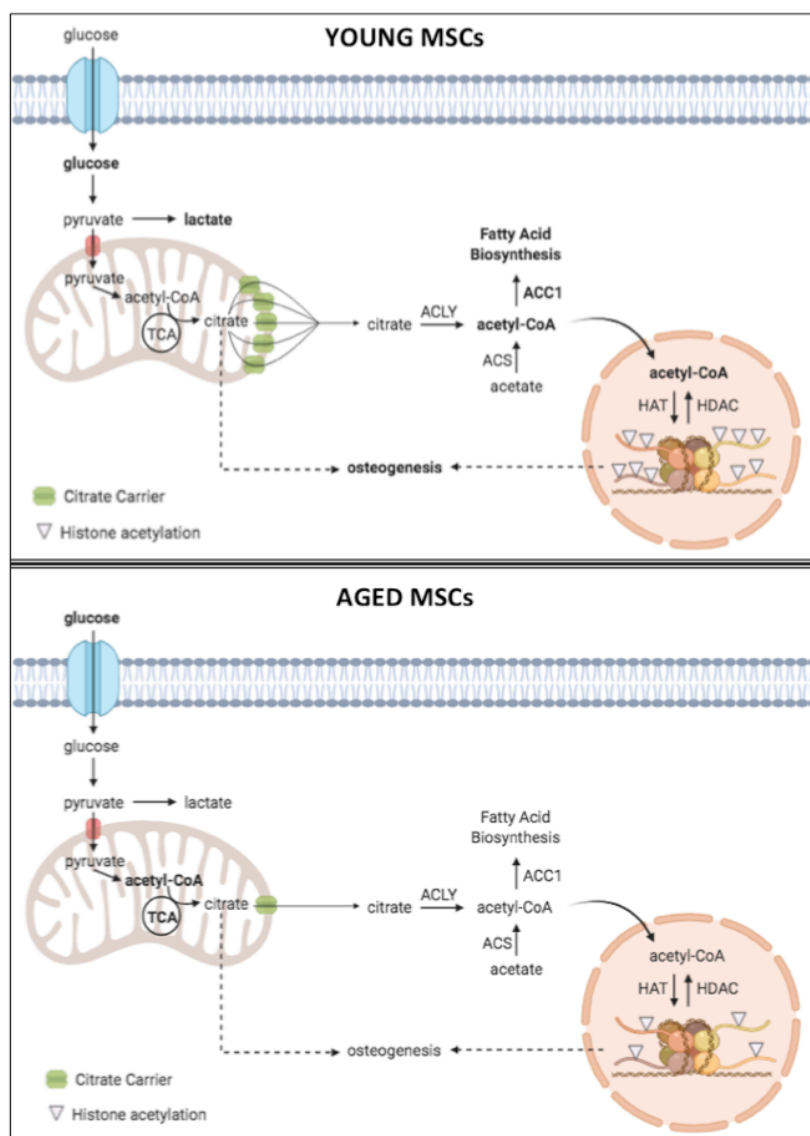

394

395 **Figure 5. Model for citrate carrier-mediated connection among metabolism, chromatin and**  
396 **osteogenesis in MSCs.** Upon ageing, MSCs perform glycolysis at a low extent, whereas they up-  
397 regulate fatty acid oxidation. This generates higher levels of mitochondrial acetyl-CoA. However, the  
398 cytosolic/nuclear acetyl-CoA pool of aged cells is decreased, due to lower citrate carrier levels.  
399 Concomitantly, aged cells exhibit decreased fatty acid biosynthesis and lower histone acetylation. The  
400 impaired export of acetyl-CoA from the mitochondria to the cytosol due to the reduced citrate carrier  
401 levels is responsible for the lower osteogenic potential of aged cells. Bold text indicates increase in  
402 accumulation and/or pathway.

403

404 We next sought to understand the biological consequences of the CiC-mediated  
405 mitochondrial-nuclear communication. The efficient differentiation of MSCs towards the  
406 adipogenic and osteogenic lineages requires oxidative metabolism and a fully functional lipid  
407 biosynthesis pathway (Wellen et al. 2009), including efficient export of the acetyl-CoA from

408 mitochondria to the cytoplasm. Hence, we speculated that the decrease of citrate carrier levels  
409 observed in the aged cells might contribute to the lower differentiation potential of aged MSCs.  
410 To address this possibility, we treated young cells with BTA and we induced cell differentiation  
411 into adipocytes and osteocytes. Unexpectedly, although adipogenesis was only mildly affected  
412 by CiC inhibition (Figure S4C), osteogenic differentiation was strongly decreased in BTA-  
413 treated cells (Figure 4D). This behaviour of young MSCs treated with BTA mimics the  
414 behaviour of aged MSCs (Figure 1C and S1E), suggesting that CiC activity is required for  
415 successful osteogenic differentiation. To further confirm that the impaired acetyl-CoA export  
416 from mitochondria was responsible for the lower osteogenic differentiation capacity of MSCs  
417 from old mice, we supplemented media of aged MSCs with sodium acetate for three days and  
418 we then induced cell differentiation into osteocytes. Impressively, acetate treatment rescued  
419 the capacity of aged cells to give rise to osteocytes (Figure 4E), to levels similar to those in  
420 young cells. These data clearly demonstrate that citrate carrier mediates the connection  
421 between age-associated changes in chromatin, metabolism, and stemness upon ageing of  
422 MSCs.

## 423 **DISCUSSION**

424 The data presented here suggest a model (Figure 5), whereby ageing-driven changes in  
425 metabolism and chromatin structure lead to transcriptional alterations and ultimately, to  
426 decreased osteogenic potential of aged MSCs. Our data demonstrate that the molecular link  
427 between mitochondrial metabolism and chromatin landscape is the citrate carrier. Upon  
428 ageing, lower citrate carrier levels result in impaired acetyl-CoA flux and thus de-regulated  
429 mitochondrial-nuclear communication and defective osteogenesis.

430 We show that MSCs enriched for PDGFR $\alpha$  and Sca-1 markers exhibit chromatin compaction  
431 upon ageing. Interestingly, the age-associated effect on chromatin architecture appears to be  
432 cell- and tissue- type specific. For instance, human MSCs from peripheral blood show similar  
433 compaction of chromatin around gene promoters upon ageing (Ucar et al. 2017), whereas  
434 purified developing B cells hardly show any significant difference in chromatin accessibility  
435 (Koohy et al. 2018). It is crucial to highlight, though, that in contrast to physiological ageing,  
436 oncogene-induced senescence causes wide-spread changes in chromatin architecture with a  
437 strong, overall increase in chromatin accessibility (De Cecco et al. 2013; Parry et al. 2018). In  
438 addition to monitor global chromatin accessibility, we used our ATAC-seq dataset to predict  
439 changes in transcription factor activity during ageing. The most prominently enriched motif  
440 belongs to CTCF (Figure 2E), a key component of chromatin that is critical for 3D genome  
441 organization, transcription control and enhancer/promoter insulation (Braccioli and de Wit  
442 2019). Although we do not have any further insight into the role of CTCF in the ageing process

443 of MSCs, it is tempting to speculate that CTCF, as a major structural chromatin-associated  
444 protein, is part of the network that drives the observed changes in accessibility during ageing.  
445 Metabolic switches occur frequently during development as well as upon differentiation and a  
446 pluripotent stem cell state is usually strongly correlated with a specific metabolic profile (Shyh-  
447 Chang, Daley, and Cantley 2013). In particular, multipotent MSCs rely on glycolysis whereas  
448 they up-regulate oxidative phosphorylation upon differentiation into the adipogenic and  
449 osteogenic lineages. Here, we demonstrate that aged MSCs show lower glycolytic rate and  
450 rely more on FAO, which results in higher acetyl-CoA production (Figure 3). However, acetyl-  
451 CoA remains inside the mitochondria of aged cells and it cannot be used for acetylation of  
452 histones, due to lower citrate carrier levels (Figure 4). Importantly, non-enzymatic protein  
453 acetylation in mitochondria has been previously described (Hong et al. 2016; James et al.  
454 2017) and acetylation of mitochondrial proteins might have broader consequences on their  
455 function, that might be worth investigating in the future.

456 As shown in Figures 1D and 1E, we found that the age-associated decrease in MSC  
457 differentiation capacity affects only the trabecular bone compartment, whereas the quality of  
458 the cortical bone remained unaffected upon ageing, consistent to previous reports (Ritzel et al.  
459 1997; Eswaran et al. 2006; Christiansen et al. 2011). A likely explanation of this observation is  
460 that MSCs reside almost exclusively in the trabecular bone, thereby suggesting that this  
461 compartment is more heavily affected by defects in MSC function.

462 We identified here that citrate carrier links chromatin architecture and stem cell fate decisions  
463 upon ageing. However, it is important to stress that this interconnection might be cell type-  
464 specific. A recent study (Henrich et al. 2018) used proteomic analysis to profile changes in  
465 the proteome of human bone marrow-resident cells, including hematopoietic stem cells and  
466 progenitor cells (HPCs), from 59 individuals between 20 and 60 years old. Interestingly, citrate  
467 carrier as well as several proteins of the initial glycolytic steps are up-regulated in aged HPCs,  
468 which is likely a reminiscence of the Warburg effect. The upregulation of the citrate carrier  
469 might also be linked to the higher proliferative capacity of HPCs compared to MSCs, with age  
470 (Akunuru and Geiger 2016). This phenomenon is also observed in cancer cells (Fernandez et  
471 al. 2018). In contrast to our observations, the authors did not report any change in citrate carrier  
472 levels in MSCs between donors of different ages. One possible explanation is the differences  
473 in the isolation protocol and the cell culture conditions. Henrich et al. isolated MSCs following  
474 the classical plastic adherence approach (Wagner et al. 2008), which isolates a much more  
475 diverse set of MSCs. In addition, expansion of MSCs was done at atmospheric oxygen,  
476 whereas we cultured MSCs permanently under low oxygen concentration, more accurately  
477 mimicking their physiological niche. Given that oxygen tension has a great impact on various  
478 energy-producing pathways and in particular on mitochondrial metabolism, these differences  
479 in cell culture conditions might explain the differences in CiC levels.



480 Understanding the molecular mechanism mediating the mito-nuclear communication during  
481 ageing in MSCs enabled us to rescue the age-related osteogenic differentiation defect, by  
482 acetate supplementation of aged MSCs (Figure 4E). Collectively, our work identifies a single  
483 mitochondrial protein as a focal point for the regulation of metabolic homeostasis and stem cell  
484 potential upon ageing. These results highlight the tight connection between metabolic and  
485 chromatin states on the regulation of stem cell fate and propose citrate carrier as an attractive  
486 target for therapeutic intervention and *in vitro* rejuvenation of aged MSCs.

487

## 488 **ACKNOWLEDGEMENTS**

489 We would like to thank all members of the Tessarz lab for discussion together with Martin Graef  
490 and Thomas Langer for critical reading of the manuscript. We are very grateful to the MPI AGE  
491 Comparative Biology facility for mouse housing. Sequencing was performed in the core  
492 facilities of the Max Planck Society at the Max Planck Institute for Plant Breeding Research  
493 (Cologne) and Molecular Genetics (Berlin). This work was funded by the Max Planck Society  
494 (to P.T. and L.P.), the NIH (to I.T and R.D., NIH GM125871), an Alexander von Humboldt  
495 postdoctoral fellowship to M.M. and an Onassis foundation graduate fellowship to A.P. Models  
496 were drawn using BioRender.

497

## 498 **AUTHOR CONTRIBUTION**

499 Conceptualisation: A.P., M.M. and P.T.; Methodology: A.P., S.P., M.M. I.T., Y.H, K. F.-D., P.G.  
500 ; Investigation: A.P., M.M., M.B., C.N., K.F.-D., Y.H., A.M. and P.G.; Formal Analysis: S.P., I.T.  
501 and P.G.; Supervision: R.D., L.P. and P.T.; Project Administration and Funding Acquisition:  
502 P.T.; Writing of Manuscript: A.P. and P.T.

503

## 504 **DATA AVAILABILITY**

505 ATAC- and RNA-seq data are available at GEO, accession code: GSEXXXX

506

## 507 **DECLARATION OF INTEREST**

508 The authors declare no competing interests.

509

## 510 **MATERIALS AND METHODS**

### 511 **Antibodies**

512 For cell sorting, CD140a-APC (#17140181), Sca-1-FITC (#11598185), Terr-119-PE  
513 (#12592182) and the Fixable Viability Dye eFluor 450 (#65086314) were all purchased from  
514 eBioscience, whereas CD45-PE (#A16325) antibody was obtained from Life Technologies. For  
515 immunofluorescence and Western Blot experiments, antibodies against pan-acetylated-Lysine  
516 (#9441S), Fatty Acid Synthase (#3189S), CBP (7389S), AceCS1 (#3658T), anti-rabbit IgG

517 HRP-linked (#7074S), anti-mouse IgG HRP-linked (#7076S) and Histone H3 (#14269) were  
518 all purchased from Cell Signaling Technology. Antibodies against ACC1 (#21923-1-AP), ACLY  
519 (#15421-1-AP) were from ProteinTech. Antibodies against TOMM20 (sc-17764) and b-actin  
520 (sc-47778) were bought from Santa Cruz Biotechnology; another TOMM20 antibody  
521 (WH0009804M1) was bought from Sigma-Aldrich. Histone H3 pan-acetyl (#39139) antibody  
522 was obtained from Active Motif, whereas Histone H4 pan-acetyl (06-866) was bought from  
523 EMD Millipore. Anti-Mouse IgG Alexa fluor 488 (#A11001) and anti-Rabbit IgG Alexa Fluor 488  
524 were bought from ThermoFisher Scientific. Citrate carrier antibody (#99168) and Histone H4  
525 antibody (#31830) were obtained from Abcam.

526

## 527 **MOUSE MODEL AND EXPERIMENTAL DETAILS**

### 528 **Mice**

529 C57BL/6N mice were bred and cared for in the mouse facility of Max Planck Institute for Biology  
530 of Ageing following ethical approval by the local authorities. For our ageing experiments and  
531 profiling we used exclusively wild type male mice at 3-4 months (young cohort) and 18-22  
532 months (old cohort) of age, a range commonly used in age-associated studies.

### 533 **Endosteal-MSCs isolation**

534 To isolate MSCs from their endosteal niche we followed a purification strategy based on a  
535 published protocol (Houlihan et al., 2012), and adapted the isolation strategy to acquire  
536 sufficient cells for our experiments. In brief, young and old C57BL6/N mice were sacrificed by  
537 cervical dislocation. Skin and muscles around the hind limbs were removed, the legs were cut  
538 above the pelvic joints and then placed in ice-cold PBS, on ice. Tibias were then separated  
539 from femurs by dislocating the joints and the clean bones were placed back in ice-cold PBS.  
540 All the following steps were performed inside the hypoxia hood. Bones were crushed and cut  
541 into tiny pieces and bone chips were incubated at 37°C for 75 minutes, in a-MEM medium  
542 containing 0.2% w/v collagenase (Sigma Aldrich), shaking at 200 rpm. To stop collagenase  
543 reaction, sample tubes with the bone chips were placed on ice and washed with a-MEM  
544 medium supplemented with 10% FBS and 1% penicillin/streptomycin. We modified the  
545 published protocol by culturing the bone fragments together with the released cells; this allows  
546 the outgrowth of more MSCs from the bone *in vitro* before cell sorting by flow cytometry,  
547 increasing the cell yield we obtain. Bone chips were transferred into T25 flasks and were  
548 cultured under humidified conditions in hypoxia (2% O<sub>2</sub>, 5%CO<sub>2</sub>, 37°C). On day 3 of cell  
549 culture, the medium was changed and on day 5 both the cells and the bone chips were  
550 passaged, using Trypsin/EDTA solution (Life Technologies). On day 8 of the cell culture the  
551 bone chips were removed and on day 12 we performed cell sorting using flow cytometry.

552

553

## 554 **Cell sorting by Flow Cytometry**

555 To obtain a purified MSC population we performed cell sorting by flow cytometry, using Fixable  
556 Viability Dye eFluor 450 (1:10000) and the following antibodies: Sca-1-FITC, CD140a-APC,  
557 CD45-PE and TER-119-PE, all in 1:1000 dilution. After harvesting, the cells were washed with  
558 PBS and resuspended in Hank's Balanced Salt Solution (1x HBSS, 0.01M HEPES, 2% FBS,  
559 1% penicillin/streptomycin, all Life Technologies). After incubation with the antibodies for 45  
560 minutes, cells were washed twice with HBSS+ and were filtered through 35µm nylon mesh into  
561 5ml sample tubes. Sorting was performed using BD FACSAria IIu and BD FACSAria IIIu  
562 instruments, under low pressure sorting conditions (100µm nozzle and 20 psi sheath  
563 pressure). The CD45-/TERR-119-/CD140a+/Sca-1+ population was sorted into an eppendorf  
564 tube containing 500µl a-MEM medium, at 4°C. Compensation was done using UltraComp  
565 compensation beads (#01222242, Invitrogen,) and ArC beads (#A10346, Life technologies).  
566 Once sorted, MSCs were centrifuged at 300g for 10 minutes at 4°C. They were then  
567 resuspended in a-MEM medium, supplemented with 10% FBS and 1% penicillin/streptomycin.  
568 Cells were cultured under humidified conditions in hypoxia (2% O<sub>2</sub>, 5%CO<sub>2</sub>, 37°C), in T25  
569 flasks.

## 570 **qRT-PCR**

571 Cells were lysed with QIAzol (QIAGEN) and total RNA was extracted using RNA extraction kit  
572 (Direct-zol RNA MiniPrep - Zymoresearch), following the manufacturer's protocol. This was  
573 followed by cDNA synthesis using Maxima™ H Minus cDNA synthesis master mix (Thermo  
574 Scientific), according to the manufacturer's instructions. Subsequent qRT-PCR was performed  
575 with 10ng of cDNA, using SYBR-Green chemistry (Roche) on a Light Cycler 96 instrument  
576 (Roche). Data were analyzed and further processed in Microsoft Excel and Prism8 software.  
577 Fold change in gene expression over control samples was calculated using the  $\Delta\Delta Cq$  method,  
578 where  $\beta$ -actin Cq values were used as internal control. All reactions were run in three technical  
579 replicates and averaged.

580 Oligos were designed using Primer3 and Blast platforms. The primers used for each gene are:

581 *Slc25a1* (encoding citrate carrier)

582 5' GGAGAGGACTATTGTGCGGTCT 3'

583 5' CCCGTGGAAAATCCTCGGTAC 3'

584 *Acan*

585 5' CGTTGCAGACCAGGAGCAAT 3'

586 5' CGGTCATGAAAGTGGCGGTA 3'

587  $\beta$ -actin

588 5' CTGCGCTGGTCGTCG 3'

589 5' CACGATGGAGGGGAATACAG 3'

590

591 **Measurement of mtDNA content**

592 RT-qPCR of mitochondrial DNA-encoded genes was used to estimate the mitochondrial DNA  
593 content. Cells were lysed with DNA lysis buffer (0.5% SDS, 0.1M NaCl, 50mM Tris pH=8.0,  
594 2.5mM EDTA pH=8.0) and lysates were incubated on a Thermoshaker (620 rpm, 55°C) for 30  
595 minutes, with Proteinase K (Sigma Aldrich). Phenol (Roth) was then added to the samples to  
596 denature proteins and after this, equal amount of chloroform (Roth) was added to remove  
597 residual phenol. To precipitate DNA, the aqueous phase was collected again and samples  
598 were incubated overnight at -80°C with sodium acetate (pH= 5.2; Invitrogen and 100% ethanol  
599 (Roth). Precipitated DNA was then washed with 70% ethanol for 20 minutes and after airdrying,  
600 it was resuspended in nuclease free water.

601 RT-qPCR for *atp6* and *cox1* genes was performed using SYBR-Green chemistry with the  
602 Roche Light Cyclor 96 instrument, as described above. Data were analyzed and further  
603 processed in Microsoft Excel and Prism8 software. Fold change in gene expression over  
604 control samples was calculated using the dCt method and genomic  $\beta$ -actin Ct values were  
605 used for internal normalization. All reactions were run in three technical replicates and  
606 averaged.

607 Oligos were designed as above. The primers used for each gene are:

608 *atp6*

609 5' GGCACCTTCACCAAATCAC 3'

610 5' CGGTTGTTGATTAGGCGTTT 3'

611 *cox-1*

612 5' AGGTTGGTTCCTCGAATGTG3'

613 5' GCCTTTCAGGAATACCACGA 3'

614

615 **Mitotracker staining**

616 Cells were washed with PBS, harvested with Trypsin-EDTA (Life Technologies) and  
617 resuspended in the pre- warmed (37°C) staining solution containing the MitoTracker Deep Red  
618 FM probe (ThermoFischer Scientific #M22426) in a final dilution 1:15000 (in a-MEM medium  
619 without FBS and phenol red). Cells were incubated with the staining solution for 30 minutes at  
620 37°C, under hypoxic conditions. They were then washed twice with PBS, and centrifuged at  
621 500g for 5 minutes. In the end, they were resuspended in a-MEM medium without FBS and  
622 phenol red. After addition of DAPI (Invitrogen) for dead-cell exclusion right before  
623 measurement, cells were analyzed by flow cytometry (BD FACSCANTO II cytometer, BD  
624 Biosciences). Data were collected using FACS-Diva software and analyzed using FlowJo  
625 software.

626

627

## 628 **Measurement of bone parameters by $\mu$ CT**

629 To assess changes in bone quality upon ageing, we dissected femurs from young and old mice  
630 and collected them in PBS. Mouse femurs were then scanned with a high resolution  $\mu$ CT  
631 scanner (SkyScan 1176, Bruker, Belgium) with an isotropic voxel size of 8.8  $\mu\text{m}^3$ . The x-ray  
632 settings for each scan were 50 kV and 200  $\mu\text{A}$  using a 0.5 mm aluminum filter. All scans were  
633 performed over 360 degrees with a rotation step of 0.3 degrees and a frame averaging of 1.  
634 Images were reconstructed and analyzed using NRecon and CTAn software, respectively  
635 (Bruker, Belgium). Trabecular and cortical bone regions of distal femurs were selected with  
636 reference to the growth plate (0.44-2.2 and 2.2-2.64 mm from growth plate, respectively). Bone  
637 mineral density was determined based on calibration with two phantoms of known density  
638 (Bruker, Belgium), which were scanned under the same conditions as the bone samples.

## 639 **Oxygen Consumption**

640 The SeaHorse XF96 extracellular Flux Analyzer (Agilent Technologies) was used to determine  
641 oxygen consumption rate in young and aged cells. 20000 cells were seeded in 96-well  
642 SeaHorse plates, after coating them with 10% Gelatin - 90% Poly-L-Lysine solution for 1 hour.  
643 Cells were incubated overnight at 37°C, in a humidified 5%  $\text{CO}_2$ , 2%  $\text{O}_2$  incubator, with 200 $\mu\text{l}$   
644 of a-MEM medium, supplemented with 10% FBS and 1% Penicillin/Streptomycin. On the day  
645 of the experiment cells were treated with or without 100 $\mu\text{M}$  etomoxir (Sigma Aldrich) and  
646 incubated for 1 hour at 37°C, in a humidified 5%  $\text{CO}_2$ , 2%  $\text{O}_2$  incubator. They were then washed  
647 twice with assay medium (XF-DMEM medium supplemented with 10mM Glucose, 1mM  
648 Pyruvate and 2mM L-Glutamine) and incubated with this medium for 1 hour prior to loading  
649 into the XF Analyzer, in a non- $\text{CO}_2$ -containing incubator. Following measurements of resting  
650 respiration, cells were treated subsequently with 20 $\mu\text{M}$  oligomycin, 5 $\mu\text{M}$  FCCP and 5 $\mu\text{M}$   
651 Rotenone/Antimycin (all from Agilent Technologies). Each measurement was taken over a 2-  
652 min interval followed by 2-min of mixing and 2-min of incubation. Three measurements were  
653 taken for the resting OCR: after oligomycin treatment, after FCCP and after  
654 Rotenone/Antimycin A treatment. Values were normalized to protein concentration using  
655 Bradford kit and were plotted using the Wave 2.4 and the Prism8 software.

## 656 **Colony-Forming Unit (CFU) assay**

657 To determine the efficiency by which MSCs form colonies 10<sup>2</sup> cells were seeded in a 6-well  
658 plate and cultured for 10-12 days at 37°C, in a humidified 5%  $\text{CO}_2$ , 2%  $\text{O}_2$  incubator. Plates  
659 were washed with PBS and stained with 1% (v/v) Crystal Violet solution (Sigma Aldrich) for 5-  
660 10 minutes at room temperature. Cells were then washed thoroughly with water for 3 times  
661 and visible colonies were counted. Images were acquired on a CanonScan 9000F Mark II  
662 scanner.

663

664

## 665 **Differentiation assays**

### 666 i) Differentiation to adipocytes

667 For adipogenesis experiments,  $2 \times 10^3$  cells were seeded in 96-well plates. Adipogenic  
668 differentiation was induced once cells reached confluency, by culturing them in control (a-MEM  
669 medium supplemented with 10% FBS and 1% penicillin/streptomycin) or differentiation (a-  
670 MEM medium supplemented with 10% FBS, 1% penicillin/streptomycin and i)  $1 \mu\text{M}$   
671 dexamethasone (Sigma Aldrich) ii)  $1 \mu\text{M}$  IBMX (Sigma Aldrich) iii)  $10 \mu\text{g/ml}$  insulin (Sigma  
672 Aldrich) and iv)  $100 \mu\text{M}$  indomethacin (Sigma Aldrich)) media, for 8-10 days. For BTA treatment  
673 of young cells,  $1 \text{mM}$  BTA (Sigma Aldrich) was added in the control and adipogenic media  
674 throughout the differentiation period.

675 Adipocytes were detected by Oil-Red-O (Sigma Aldrich) staining. Cells were washed with PBS  
676 and fixed in 3.7% formaldehyde (Roth) for 30 minutes, at room temperature. After fixation, cells  
677 were washed twice with ddH<sub>2</sub>O and once with 60% isopropanol (Roth), with every washing  
678 step lasting 5 minutes. Cells were then stained with Oil-Red-O staining solution for 15 minutes  
679 at room temperature. After staining, cells were washed four times with ddH<sub>2</sub>O and images were  
680 acquired with bright-field microscope, using the 20x objective.

### 681 i) Differentiation to osteoblasts

682 For osteogenesis experiments,  $2 \times 10^3$  cells were seeded in 96-well plates. Osteogenesis was  
683 induced once cells reached confluency, by culturing them in control (a-MEM medium  
684 supplemented with 10% FBS and 1% penicillin/streptomycin) or differentiation (a-MEM  
685 medium supplemented with 10% FBS and 1% penicillin/streptomycin and i)  $100 \text{nM}$   
686 dexamethasone ii)  $10 \text{mM}$  beta-glycerophosphate (Sigma Aldrich) iii)  $100 \mu\text{M}$  ascorbic acid  
687 (Sigma Aldrich)) media, for 11 days. For BTA treatment of young cells,  $1 \text{mM}$  BTA was added  
688 in the control and osteogenic media throughout the differentiation period. For acetate treatment  
689 of aged cells,  $5 \text{mM}$  of sodium acetate was added in the media three days prior to the induction  
690 of differentiation and was then removed.

691 Osteoblasts were detected by Alizarin Red S (Sigma Aldrich) staining, performed 12 days after  
692 induction of osteogenesis. Cells were washed once with PBS and fixed in 3.7% formaldehyde  
693 for at least 30 minutes, at room temperature. Fixation was followed by washing of cells with  
694 ddH<sub>2</sub>O. Cells were then incubated with the Alizarin Red S staining solution (2% w/v Alizarin  
695 Red S in ddH<sub>2</sub>O) for 45 minutes, protected from light. After staining, cells were washed with  
696 ddH<sub>2</sub>O and images were acquired with bright-field microscope, using the 20x objective.

### 697 i) Differentiation to chondrocytes

698 For chondrogenic experiments,  $75 \times 10^3$  cells were seeded in 96-well plates with flat (control) or  
699 conical (differentiated) bottom. Chondrogenesis was induced once cells reached confluency,  
700 by culturing them in control (a-MEM medium supplemented with 10% FBS and 1%  
701 penicillin/streptomycin) or differentiation (DMEM medium supplemented with 10% FBS and

702 1% penicillin/streptomycin and i) 100nM dexamethasone ii) 1% ITS (Sigma Aldrich), iii) 10  $\mu$ M  
703 ascorbic acid iv) 1mM sodium pyruvate (Gibco) v) 50  $\mu$ g/ml proline (Sigma Aldrich) and vi)  
704 20nm/ml TGF $\beta$ 3 (Sigma Aldrich)) media for 12-14 days.

705 Confirmation of osteogenesis was performed by extracting RNA and running qPCR analysis  
706 for osteogenesis markers, as described above.

#### 707 **Immunofluorescence experiments**

708 For immunofluorescence experiments,  $2 \times 10^3$  cells were seeded in 96-well plates with glass  
709 bottom (Greiner) and treated as indicated in each experiment. After treatments, cells were  
710 fixed for 15 minutes at 37°C with 3.7% v/v formaldehyde in a-MEM medium, supplemented  
711 with 10% FBS and 1% penicillin/streptomycin. Samples were washed with PBS twice,  
712 permeabilized with 0.1% TritonX-100 (Roth) in PBS for 10-15 minutes and blocked with 5%  
713 BSA in PBS (Roth) for 10 minutes. Samples were then incubated with the indicated primary  
714 antibodies in 5%BSA-PBS, in dilutions 1:100-1:300 overnight at 4°C. Following this, they were  
715 washed three times with PBS, with each washing step lasting 10 minutes. Samples were then  
716 incubated with the appropriate secondary fluorescent antibodies diluted 1:500 for 45 minutes,  
717 protected from light. After three washing steps of 10 minutes each, cells were mounted using  
718 Roti-Mount FluorCare mounting medium (HP20.1, ROTH), containing DAPI. Images were  
719 acquired using 40x and 100x objective lens on SP8X leica confocal microscope.

#### 720 **Western Blot experiments**

721 For all western blot experiments cells were harvested and lysed with RIPA buffer (150mM  
722 NaCl, 1% TritonX-100, 0.5% sodium deoxycholate, 0.1% SDS, 50mM Tris pH=8.0)  
723 supplemented with 5mM sodium butyrate and 1x Protease Inhibitor Cocktail (Thermo  
724 Scientific). For efficient lysis, cells were incubated with RIPA buffer at 4°C, for 30 minutes,  
725 rotating, and then centrifuged for 10 minutes at 6500g. Protein concentration was determined  
726 using BCA protein assay kit (SERVA). 20-50 $\mu$ g of total protein were loaded into each well and  
727 SDS-PAGE electrophoresis was performed at 160V for ~45 minutes. This was followed by  
728 transfer to nitrocellulose membrane, using the Trans-Blot Turbo blotting apparatus and  
729 reagents, all provided by Bio-Rad. Protein transfer was confirmed by Ponceau S (Sigma  
730 Aldrich) staining for 1-2 minutes. The membranes were then blocked using 5% non-fat dry milk  
731 in Tris-buffered saline-0.1% Tween20 (TBS-T) for 1 hour at room temperature (RT).  
732 Membranes were incubated with the indicated primary antibodies, diluted in 3% Milk in TBS-  
733 T, at 4°C overnight, washed three times with PBS for 5 minutes each washing step and  
734 incubated with the appropriate horseradish peroxidase (HRP)-conjugated secondary  
735 antibodies diluted 1:10000 in 5% BSA in TBS-T, for 1 hour at RT. After three 10-minute  
736 washing steps in TBS-T, the desired proteins were visualized by providing fresh HRP-substrate  
737 solution (Luminol Enhancer Solution/Peroxide Solution - Promega) and exposure of  
738 membranes for specific time periods to photographic film, using the Curix60 instrument (Agfa).

739 **Measurement of glucose, lactate and pH**

740 Measurement of glucose, lactate and pH in the media of MSCs was performed using the Vi-  
741 CELL MetaFLEX instrument (Beckman Coulter), according to manufacturer's instructions. All  
742 measurements were done in triplicates and averaged.

743 **Metabolite extraction for Liquid Chromatography mass spectrometry (LC-MS)**

744 Cells were cultured in a-MEM medium supplemented with 10% FBS and 1%  
745 penicillin/streptomycin, harvested using Trypsin-EDTA (Life Technologies) and snap-frozen in  
746 liquid nitrogen. Metabolite extraction from each cell pellet was performed using 1 mL of a  
747 mixture of 40:40:20 [v:v:v] of pre-chilled (-20°C) acetonitrile:methanol:water (Optima™ LC/MS  
748 grade, Thermo Fisher Scientific). The samples were subsequently vortexed until the cell  
749 pellets were fully suspended, before incubating them on an orbital mixer at 4°C for 30 minutes  
750 at 1500 rpm. For further disintegration, samples were sonicated for 10 minutes in an ice cooled  
751 bath sonicator (VWR, Germany) before centrifuging them for 10 minutes at 21100x g and 4°C.  
752 The metabolite-containing supernatant was collected in fresh tubes and concentrated to  
753 dryness in a Speed Vac concentrator (Eppendorf). The protein-containing pellets were also  
754 collected and used for protein quantification (BCA Protein Assay Kit, Thermo Fisher Scientific).

755 i) Targeted LC-MS analysis of acetyl CoA, NAD and NADH

756 For the analysis of acetyl-CoA, NAD<sup>+</sup> and NADH the extracted metabolites were re-suspended  
757 in 40 µl of UPLC-grade acetonitrile:water (80:20 [v:v], Optima™ LC-MS-grade, Thermo Fisher  
758 Scientific). The samples were analyzed on an Acquity iClass UPLC (Waters), using a SeQuant  
759 ZIC-HILIC 5µm polymer 100 x 2.1 mm column (Merck) connected to a Xevo TQ-S (Waters)  
760 triple quadrupole mass spectrometer.

761 8µl of the re-suspended metabolite extract were injected onto the column and separated using  
762 a flow rate of 500 µl/minute of buffer A (10mM ammonium acetate, 0.1% acetic acid ) and  
763 buffer B (acetonitrile) using the following gradient: 0 - 0.5 minutes 20% A; 0.5 - 1.4 minutes 20  
764 - 35% A; 1.4 – 2.5 minutes 35 - 65% A. After 2.5 minutes the system is set back to 20% A and  
765 re-equilibrated for 2.5 minutes.

766 The eluting metabolites were detected in positive ion mode using ESI MRM (multi reaction  
767 monitoring) applying the following settings: capillary voltage 1.5 kV, desolvation temperature  
768 550°C, desolvation gas flow rate 800 L/h, collision cell gas flow 0.15 mL/min. The following  
769 MRM transitions were used for relative compound quantification of acetyl CoA m/z precursor  
770 mass (M+H<sup>+</sup>) 810, fragment mass (M+H<sup>+</sup>) m/z 303 using a cone voltage of 98V and a collision  
771 energy of 28V, NAD m/z precursor mass (M+H<sup>+</sup>) 664, fragment mass (M+H<sup>+</sup>) m/z 136 using  
772 a cone voltage of 50V and a collision energy of 56V and NADH m/z precursor mass (M+H<sup>+</sup>)  
773 665, fragment mass (M+H<sup>+</sup>) m/z 108 using a cone voltage of 70V and a collision energy of  
774 70V. For each compound two additional fragments were monitored as qualitative controls for



775 compound identity. Data analysis and peak integration were performed using the TargetLynx  
776 Software (Waters).

### 777 **Gas Chromatography mass spectrometry (GC-MS) for the analysis of TCA cycle** 778 **intermediates and amino acids**

779 High resolution GC-MS analysis (Q-Exactive GC, Thermo Fisher Scientific) was performed for  
780 the analysis of amino acids and metabolites from the TCA cycle. For this purpose, the dried  
781 metabolite extracts were derivatized using methoxyamine (methoxyamine hydrochloride,  
782 Sigma) and N-Methyl-N-trimethylsilyl-trifluoroacetamid (MSTFA, Macherey-Nagel) before  
783 performing the GC-MS analysis. In brief, dried samples were resuspended in a freshly  
784 prepared (20 mg/mL) solution of methoxyamine in pyridine (Sigma). The re-suspended pellets  
785 were incubated for 90 minutes at 40°C on an orbital shaker (VWR) at 1500 rpm. After adding  
786 additional 45 µL of MSTFA, the samples were incubated for an additional 30 minutes at 40°C  
787 and 1500 rpm. At the end of the derivatization the samples were centrifuged for 10 minutes at  
788 21100x g and 40 µL of the clear supernatant was transferred to fresh autosampler vials with  
789 conical glass inserts. For the GC-MS analysis 1 µL of each sample was injected using a PAL  
790 autosample system (Thermo Fisher Scientific) using a Split/Splitless (SSL) injector at 300 C in  
791 splitless mode. The carrier gas flow (helium) was set to 2 ml/min using a 30m DB-35MS  
792 capillary column (0.250 mm diameter and 0.25 µm film thickness, Agilent). The GC  
793 temperature program was the following: 2 minutes at 85°C, followed by a 15°C per minute  
794 ramp to 330°C. At the end of the gradient, the temperature was held for additional 6 minutes  
795 at 330°C. The transfer line and source temperature were both set to 280°C. The filament, which  
796 was operating at 70V, was switched on 2 minutes after the sample was injected. During the  
797 whole gradient period the MS was operated in full scan mode covering a mass range m/z 70  
798 and 800 with a scan speed of 20 Hertz.

799 The GC-HRMS data were analysed and quantified using the TraceFinder (Thermo Fisher  
800 Scientific) software tool. The identity of each compound was validated by authentic reference  
801 compounds, which were analysed in independent GC-MS runs.

802

### 803 **RNA-seq**

804 Total RNA was isolated using the RNA extraction kit (Direct-zol RNA MiniPrep -  
805 Zymoresearch), following the manufacturer's protocol. Once RNA quality and integrity were  
806 verified, RNA libraries were created and the desired cDNA fragments were sent for  
807 sequencing. Libraries were sequenced as single-end 150bp reads on Illumina HiSeq 4000.  
808 The sequenced reads of RNA-seq dataset were processed using zUMIs (version 2.2.1)  
809 (Parekh et al. 2018) with STAR (version 2.6.1a) (Dobin et al. 2013), samtools (version 1.9) (H.  
810 Li et al. 2009) and featureCounts from Rsubread (version 1.32.4) (Liao, Smyth, and Shi 2014).  
811 The reads were mapped to the mouse genome (mm10) with the ensembl annotation verion

812 GRCm38.91. The generated count matrix was further analysed using R (version 3.5.1). First,  
813 genes were filtered using "filterByExpr" function of edgeR (Robinson, McCarthy, and Smyth  
814 2010) with the min.count=5. The differential gene expression analysis between young and old  
815 mice was carried out using limma-trend (Ritchie et al. 2015) approach at the adjusted p-value  
816 of 0.05. Obtained sets of genes were further analysed, e.g. through gene ontology (GO)  
817 enrichment analysis.

### 818 **ATAC-seq**

819 The fastq files of sequenced reads were mapped to the mouse genome (mm10) using local  
820 alignment within bowtie2 (Langmead and Salzberg 2012) with parameters -x mm10 and -X  
821 2000. The resulting BAM files were sorted, indexed using samtools (version 1.3.1) and  
822 duplicates were removed using MarkDuplicates of Picard Tools.

### 823 **DASTk analysis**

824 The open chromatin regions were called from the resulting BAM files from mono-nucleosome,  
825 di-nucleosome, tri-nucleosome, and nucleosome-free regions using MACS2, with settings --  
826 shift -100 --extsize 200 -B --nomodel --format BAMPE. Any ATAC-seq peaks overlapping  
827 blacklisted regions for the mm10 mouse reference genome (ENCODE ENCFF547MET) were  
828 excluded from the analysis.

829 We used mouse motifs from the HOCOMOCO (Kulakovskiy et al. 2018) database version 11,  
830 and scanned for coordinates of motif sites in the mm10 mouse reference genome utilizing  
831 FIMO(Grant, Bailey, and Noble 2011) at a p-value threshold of 10<sup>-6</sup>. DASTk  
832 (<https://github.com/Dowell-Lab/DASTk>) was utilized to predict changes in transcription factor  
833 activity, using a p-value < 0.05 cutoff for statistical significance.

834

### 835 **REFERENCES**

- 836 Akunuru, Shailaja, and Hartmut Geiger. 2016. "Aging, Clonality, and Rejuvenation of  
837 Hematopoietic Stem Cells." *Trends in Molecular Medicine* 22 (8): 701–12.
- 838 Ambrosi, Thomas H., Antonio Scialdone, Antonia Graja, Sabrina Gohlke, Anne-Marie Jank,  
839 Carla Bocian, Lena Woelk, et al. 2017. "Adipocyte Accumulation in the Bone Marrow  
840 during Obesity and Aging Impairs Stem Cell-Based Hematopoietic and Bone  
841 Regeneration." *Cell Stem Cell* 20 (6): 771–84.e6.
- 842 Benayoun, Bérénice A., Elizabeth A. Pollina, and Anne Brunet. 2015. "Epigenetic Regulation  
843 of Ageing: Linking Environmental Inputs to Genomic Stability." *Nature Reviews.  
844 Molecular Cell Biology* 16 (10): 593–610.
- 845 Bickel, Perry E., John T. Tansey, and Michael A. Welte. 2009. "PAT Proteins, an Ancient  
846 Family of Lipid Droplet Proteins That Regulate Cellular Lipid Stores." *Biochimica et  
847 Biophysica Acta* 1791 (6): 419–40.
- 848 Booth, Lauren N., and Anne Brunet. 2016. "The Aging Epigenome." *Molecular Cell* 62 (5):  
849 728–44.
- 850 Braccioli, Luca, and Elzo de Wit. 2019. "CTCF: A Swiss-Army Knife for Genome  
851 Organization and Transcription Regulation." *Essays in Biochemistry* 63 (1): 157–65.
- 852 Brasaemle, Dawn L. 2007. "Thematic Review Series: Adipocyte Biology. The Perilipin Family  
853 of Structural Lipid Droplet Proteins: Stabilization of Lipid Droplets and Control of

- 854 Lipolysis." *Journal of Lipid Research* 48 (12): 2547–59.
- 855 Buenrostro, Jason D., Paul G. Giresi, Lisa C. Zaba, Howard Y. Chang, and William J.
- 856 Greenleaf. 2013. "Transposition of Native Chromatin for Fast and Sensitive Epigenomic
- 857 Profiling of Open Chromatin, DNA-Binding Proteins and Nucleosome Position." *Nature*
- 858 *Methods* 10 (12): 1213–18.
- 859 Cai, Ling, Benjamin M. Sutter, Bing Li, and Benjamin P. Tu. 2011. "Acetyl-CoA Induces Cell
- 860 Growth and Proliferation by Promoting the Acetylation of Histones at Growth Genes."
- 861 *Molecular Cell* 42 (4): 426–37.
- 862 Caplan, Arnold I. 2008. "All MSCs Are Pericytes?" *Cell Stem Cell*.
- 863 Chang, Jia, Wataru Sonoyama, Zhuo Wang, Qiming Jin, Chengfei Zhang, Paul H.
- 864 Krebsbach, William Giannobile, Songtao Shi, and Cun-Yu Wang. 2007. "Noncanonical
- 865 Wnt-4 Signaling Enhances Bone Regeneration of Mesenchymal Stem Cells in
- 866 Craniofacial Defects through Activation of p38 MAPK." *The Journal of Biological*
- 867 *Chemistry* 282 (42): 30938–48.
- 868 Christiansen, Blaine A., David L. Kopperdahl, Douglas P. Kiel, Tony M. Keaveny, and Mary
- 869 L. Bouxsein. 2011. "Mechanical Contributions of the Cortical and Trabecular
- 870 Compartments Contribute to Differences in Age-Related Changes in Vertebral Body
- 871 Strength in Men and Women Assessed by QCT-Based Finite Element Analysis."
- 872 *Journal of Bone and Mineral Research: The Official Journal of the American Society for*
- 873 *Bone and Mineral Research* 26 (5): 974–83.
- 874 Cluntun, Ahmad A., He Huang, Lunzhi Dai, Xiaojing Liu, Yingming Zhao, and Jason W.
- 875 Locasale. 2015. "The Rate of Glycolysis Quantitatively Mediates Specific Histone
- 876 Acetylation Sites." *Cancer & Metabolism* 3 (September): 10.
- 877 De Cecco, Marco, Steven W. Criscione, Edward J. Peckham, Sara Hillenmeyer, Eliza A.
- 878 Hamm, Jayameenakshi Manivannan, Abigail L. Peterson, Jill A. Kreiling, Nicola Neretti,
- 879 and John M. Sedivy. 2013. "Genomes of Replicatively Senescent Cells Undergo Global
- 880 Epigenetic Changes Leading to Gene Silencing and Activation of Transposable
- 881 Elements." *Aging Cell* 12 (2): 247–56.
- 882 Deschaseaux, Frédéric, Luc Sensébé, and Dominique Heymann. 2009. "Mechanisms of
- 883 Bone Repair and Regeneration." *Trends in Molecular Medicine* 15 (9): 417–29.
- 884 Dixon, Jesse R., Inkyung Jung, Siddarth Selvaraj, Yin Shen, Jessica E. Antosiewicz-
- 885 Bourget, Ah Young Lee, Zhen Ye, et al. 2015. "Chromatin Architecture Reorganization
- 886 during Stem Cell Differentiation." *Nature* 518 (7539): 331–36.
- 887 Dobin, Alexander, Carrie A. Davis, Felix Schlesinger, Jorg Drenkow, Chris Zaleski, Sonali
- 888 Jha, Philippe Batut, Mark Chaisson, and Thomas R. Gingeras. 2013. "STAR: Ultrafast
- 889 Universal RNA-Seq Aligner." *Bioinformatics* 29 (1): 15–21.
- 890 Dominici, M., K. Le Blanc, I. Mueller, I. Slaper-Cortenbach, Fc Marini, Ds Krause, Rj Deans,
- 891 A. Keating, Dj Prockop, and Em Horwitz. 2006. "Minimal Criteria for Defining Multipotent
- 892 Mesenchymal Stromal Cells. The International Society for Cellular Therapy Position
- 893 Statement." *Cytotherapy* 8 (4): 315–17.
- 894 Eswaran, Senthil K., Atul Gupta, Mark F. Adams, and Tony M. Keaveny. 2006. "Cortical and
- 895 Trabecular Load Sharing in the Human Vertebral Body." *Journal of Bone and Mineral*
- 896 *Research: The Official Journal of the American Society for Bone and Mineral Research*
- 897 21 (2): 307–14.
- 898 Etchegaray, Jean-Pierre, and Raul Mostoslavsky. 2016. "Interplay between Metabolism and
- 899 Epigenetics: A Nuclear Adaptation to Environmental Changes." *Molecular Cell* 62 (5):
- 900 695–711.
- 901 Fernandez, Harvey R., Shreyas M. Gadre, Mingjun Tan, Garrett T. Graham, Rami Mosaoa,
- 902 Martin S. Ongkeko, Kyu Ah Kim, et al. 2018. "The Mitochondrial Citrate Carrier,
- 903 SLC25A1, Drives Stemness and Therapy Resistance in Non-Small Cell Lung Cancer."
- 904 *Cell Death and Differentiation* 25 (7): 1239–58.
- 905 Gnoni, Gabriele V., Paola Priore, Math J. H. Geelen, and Luisa Siculella. 2009. "The
- 906 Mitochondrial Citrate Carrier: Metabolic Role and Regulation of Its Activity and
- 907 Expression." *IUBMB Life* 61 (10): 987–94.
- 908 Grant, Charles E., Timothy L. Bailey, and William Stafford Noble. 2011. "FIMO: Scanning for

- 909 Occurrences of a given Motif." *Bioinformatics* 27 (7): 1017–18.
- 910 Hennrich, Marco L., Natalie Romanov, Patrick Horn, Samira Jaeger, Volker Eckstein,  
911 Violetta Steeples, Fei Ye, et al. 2018. "Cell-Specific Proteome Analyses of Human Bone  
912 Marrow Reveal Molecular Features of Age-Dependent Functional Decline." *Nature*  
913 *Communications* 9 (1): 4004.
- 914 Hlouschek, Julian, Christine Hansel, Verena Jendrossek, and Johann Matschke. 2018. "The  
915 Mitochondrial Citrate Carrier (SLC25A1) Sustains Redox Homeostasis and  
916 Mitochondrial Metabolism Supporting Radioresistance of Cancer Cells With Tolerance  
917 to Cycling Severe Hypoxia." *Frontiers in Oncology* 8 (May): 170.
- 918 Hong, Shin Yee, Li Theng Ng, Li Fang Ng, Takao Inoue, Nicholas S. Tolwinski, Thilo Hagen,  
919 and Jan Gruber. 2016. "The Role of Mitochondrial Non-Enzymatic Protein Acylation in  
920 Ageing." *PloS One* 11 (12): e0168752.
- 921 Houlihan, Diarmaid D., Yo Mabuchi, Satoru Morikawa, Kunimichi Niibe, Daisuke Araki,  
922 Sadafumi Suzuki, Hideyuki Okano, and Yumi Matsuzaki. 2012. "Isolation of Mouse  
923 Mesenchymal Stem Cells on the Basis of Expression of Sca-1 and PDGFR- $\alpha$ ." *Nature*  
924 *Protocols* 7 (12): 2103–11.
- 925 Ito, Keisuke, and Toshio Suda. 2014. "Metabolic Requirements for the Maintenance of Self-  
926 Renewing Stem Cells." *Nature Reviews. Molecular Cell Biology* 15 (4): 243–56.
- 927 James, Andrew M., Kurt Hoogewijs, Angela Logan, Andrew R. Hall, Shujing Ding, Ian M.  
928 Fearnley, and Michael P. Murphy. 2017. "Non-Enzymatic N-Acetylation of Lysine  
929 Residues by AcetylCoA Often Occurs via a Proximal S-Acetylated Thiol Intermediate  
930 Sensitive to Glyoxalase II." *Cell Reports* 18 (9): 2105–12.
- 931 Kaelin, William G., Jr, and Steven L. McKnight. 2013. "Influence of Metabolism on  
932 Epigenetics and Disease." *Cell* 153 (1): 56–69.
- 933 Kim, Mijung, Chanwha Kim, Yu Suk Choi, Minhwan Kim, Chanjeoung Park, and Yousin Suh.  
934 2012. "Age-Related Alterations in Mesenchymal Stem Cells Related to Shift in  
935 Differentiation from Osteogenic to Adipogenic Potential: Implication to Age-Associated  
936 Bone Diseases and Defects." *Mechanisms of Ageing and Development* 133 (5): 215–  
937 25.
- 938 Kolukula, Vamsi K., Geetaram Sahu, Anton Wellstein, Olga C. Rodriguez, Anju Preet, Vito  
939 Iacobazzi, Gabriella D'Orazi, Chris Albanese, Ferdinando Palmieri, and Maria Laura  
940 Avantaggiati. 2014. "SLC25A1, or CIC, Is a Novel Transcriptional Target of Mutant p53  
941 and a Negative Tumor Prognostic Marker." *Oncotarget* 5 (5): 1212–25.
- 942 Koohy, Hashem, Daniel J. Bolland, Louise S. Matheson, Stefan Schoenfelder, Claudia  
943 Stellato, Andrew Dimond, Csilla Várnai, et al. 2018. "Genome Organization and  
944 Chromatin Analysis Identify Transcriptional Downregulation of Insulin-like Growth Factor  
945 Signaling as a Hallmark of Aging in Developing B Cells." *Genome Biology* 19 (1): 126.
- 946 Kulakovskiy, Ivan V., Ilya E. Vorontsov, Ivan S. Yevshin, Ruslan N. Sharipov, Alla D.  
947 Fedorova, Eugene I. Rumynskiy, Yulia A. Medvedeva, et al. 2018. "HOCOMOCO:  
948 Towards a Complete Collection of Transcription Factor Binding Models for Human and  
949 Mouse via Large-Scale ChIP-Seq Analysis." *Nucleic Acids Research* 46 (D1): D252–59.
- 950 Langmead, Ben, and Steven L. Salzberg. 2012. "Fast Gapped-Read Alignment with Bowtie  
951 2." *Nature Methods* 9 (4): 357–59.
- 952 Liao, Yang, Gordon K. Smyth, and Wei Shi. 2014. "featureCounts: An Efficient General  
953 Purpose Program for Assigning Sequence Reads to Genomic Features." *Bioinformatics*  
954 30 (7): 923–30.
- 955 Li, Bing, Michael Carey, and Jerry L. Workman. 2007. "The Role of Chromatin during  
956 Transcription." *Cell* 128 (4): 707–19.
- 957 Li, Heng, Bob Handsaker, Alec Wysoker, Tim Fennell, Jue Ruan, Nils Homer, Gabor Marth,  
958 Goncalo Abecasis, Richard Durbin, and 1000 Genome Project Data Processing  
959 Subgroup. 2009. "The Sequence Alignment/Map Format and SAMtools." *Bioinformatics*  
960 25 (16): 2078–79.
- 961 López-Otín, Carlos, Maria A. Blasco, Linda Partridge, Manuel Serrano, and Guido Kroemer.  
962 2013. "The Hallmarks of Aging." *Cell* 153 (6): 1194–1217.
- 963 Lu, Chao, and Craig B. Thompson. 2012. "Metabolic Regulation of Epigenetics." *Cell*

- 964 *Metabolism* 16 (1): 9–17.
- 965 Morciano, Patrizia, Chiara Carrisi, Loredana Capobianco, Linda Mannini, Giosalba Burgio,  
966 Gianluca Cestra, Giuseppe E. De Benedetto, Davide F. V. Corona, Antonio Musio, and  
967 Giovanni Cenci. 2009. “A Conserved Role for the Mitochondrial Citrate Transporter  
968 Sea/SLC25A1 in the Maintenance of Chromosome Integrity.” *Human Molecular  
969 Genetics* 18 (21): 4180–88.
- 970 Morikawa, Satoru, Yo Mabuchi, Yoshiaki Kubota, Yasuo Nagai, Kunimichi Niibe, Emi  
971 Hiratsu, Sadafumi Suzuki, et al. 2009. “Prospective Identification, Isolation, and  
972 Systemic Transplantation of Multipotent Mesenchymal Stem Cells in Murine Bone  
973 Marrow.” *The Journal of Experimental Medicine* 206 (11): 2483–96.
- 974 Moussaieff, Arieh, Matthieu Rouleau, Daniel Kitsberg, Merav Cohen, Gahl Levy, Dinorah  
975 Barasch, Alina Nemirovski, et al. 2015. “Glycolysis-Mediated Changes in Acetyl-CoA  
976 and Histone Acetylation Control the Early Differentiation of Embryonic Stem Cells.” *Cell  
977 Metabolism* 21 (3): 392–402.
- 978 Ocampo, Alejandro, Pradeep Reddy, Paloma Martinez-Redondo, Aida Platero-Luengo,  
979 Fumiyuki Hatanaka, Tomoaki Hishida, Mo Li, et al. 2016. “In Vivo Amelioration of Age-  
980 Associated Hallmarks by Partial Reprogramming.” *Cell*.
- 981 Parekh, Swati, Christoph Ziegenhain, Beate Vieth, Wolfgang Enard, and Ines Hellmann.  
982 2018. “zUMIs - A Fast and Flexible Pipeline to Process RNA Sequencing Data with  
983 UMIs.” *GigaScience*, May. <https://doi.org/10.1093/gigascience/giy059>.
- 984 Parry, Aled J., Matthew Hoare, Dóra Bihary, Robert Hänsel-Hertsch, Stephen Smith, Kosuke  
985 Tomimatsu, Elizabeth Mannion, et al. 2018. “NOTCH-Mediated Non-Cell Autonomous  
986 Regulation of Chromatin Structure during Senescence.” *Nature Communications* 9 (1):  
987 1840.
- 988 Quirós, Pedro M., Adrienne Mottis, and Johan Auwerx. 2016. “Mitonuclear Communication in  
989 Homeostasis and Stress.” *Nature Reviews. Molecular Cell Biology* 17 (4): 213–26.
- 990 Reid, Michael A., Ziwei Dai, and Jason W. Locasale. 2017. “The Impact of Cellular  
991 Metabolism on Chromatin Dynamics and Epigenetics.” *Nature Cell Biology* 19 (11):  
992 1298–1306.
- 993 Ritchie, Matthew E., Belinda Phipson, Di Wu, Yifang Hu, Charity W. Law, Wei Shi, and  
994 Gordon K. Smyth. 2015. “Limma Powers Differential Expression Analyses for RNA-  
995 Sequencing and Microarray Studies.” *Nucleic Acids Research* 43 (7): e47.
- 996 Ritzel, H., M. Amling, M. Pösl, M. Hahn, and G. Delling. 1997. “The Thickness of Human  
997 Vertebral Cortical Bone and Its Changes in Aging and Osteoporosis: A  
998 Histomorphometric Analysis of the Complete Spinal Column from Thirty-Seven Autopsy  
999 Specimens.” *Journal of Bone and Mineral Research: The Official Journal of the  
1000 American Society for Bone and Mineral Research* 12 (1): 89–95.
- 1001 Robinson, Mark D., Davis J. McCarthy, and Gordon K. Smyth. 2010. “edgeR: A  
1002 Bioconductor Package for Differential Expression Analysis of Digital Gene Expression  
1003 Data.” *Bioinformatics* 26 (1): 139–40.
- 1004 Saito, Tadahito, Shinsuke Ohba, Fumiko Yano, Ichiro Seto, Yoshiyuki Yonehara, Tsuyoshi  
1005 Takato, and Toru Ogasawara. 2015. “Runx1 and Runx3 Are Downstream Effectors of  
1006 Nanog in Promoting Osteogenic Differentiation of the Mouse Mesenchymal Cell Line  
1007 C3H10T1/2.” *Cellular Reprogramming* 17 (3): 227–34.
- 1008 Sharma, Arpit, Hannah J. Smith, Pallas Yao, and William B. Mair. 2019. “Causal Roles of  
1009 Mitochondrial Dynamics in Longevity and Healthy Aging.” *EMBO Reports*, October,  
1010 e48395.
- 1011 Shyh-Chang, Ng, George Q. Daley, and Lewis C. Cantley. 2013. “Stem Cell Metabolism in  
1012 Tissue Development and Aging.” *Development* 140 (12): 2535–47.
- 1013 Silva Meirelles, Lindolfo da, Arnold I. Caplan, and Nance Beyer Nardi. 2008. “In Search of  
1014 the in Vivo Identity of Mesenchymal Stem Cells.” *Stem Cells* 26 (9): 2287–99.
- 1015 Spencer, Joel A., Francesca Ferraro, Emmanuel Roussakis, Alyssa Klein, Juwell Wu, Judith  
1016 M. Runnels, Walid Zaher, et al. 2014. “Direct Measurement of Local Oxygen  
1017 Concentration in the Bone Marrow of Live Animals.” *Nature* 508 (7495): 269–73.
- 1018 Srere, P. A. 1959. “The Citrate Cleavage Enzyme. I. Distribution and Purification.” *The*

- 1019 *Journal of Biological Chemistry* 234 (October): 2544–47.
- 1020 Stewart, Scott, Alan W. Gomez, Benjamin E. Armstrong, Astra Henner, and Kryn Stankunas.
- 1021 2014. “Sequential and Opposing Activities of Wnt and BMP Coordinate Zebrafish Bone
- 1022 Regeneration.” *Cell Reports* 6 (3): 482–98.
- 1023 Suda, Toshio, Keiyo Takubo, and Gregg L. Semenza. 2011. “Metabolic Regulation of
- 1024 Hematopoietic Stem Cells in the Hypoxic Niche.” *Cell Stem Cell* 9 (4): 298–310.
- 1025 TeSlaa, Tara, and Michael A. Teitell. 2014. “Techniques to Monitor Glycolysis.” *Methods in*
- 1026 *Enzymology* 542: 91–114.
- 1027 Tessarz, Peter, and Tony Kouzarides. 2014. “Histone Core Modifications Regulating
- 1028 Nucleosome Structure and Dynamics.” *Nature Reviews. Molecular Cell Biology* 15 (11):
- 1029 703–8.
- 1030 Tripodi, Ignacio J., Mary A. Allen, and Robin D. Dowell. 2018. “Detecting Differential
- 1031 Transcription Factor Activity from ATAC-Seq Data.” *Molecules* 23 (5).
- 1032 <https://doi.org/10.3390/molecules23051136>.
- 1033 Ucar, Duygu, Eladio J. Márquez, Cheng-Han Chung, Radu Marches, Robert J. Rossi, Asli
- 1034 Uyar, Te-Chia Wu, et al. 2017. “The Chromatin Accessibility Signature of Human
- 1035 Immune Aging Stems from CD8+ T Cells.” *The Journal of Experimental Medicine* 214
- 1036 (10): 3123–44.
- 1037 Wagner, Wolfgang, Patrick Horn, Mirco Castoldi, Anke Diehlmann, Simone Bork, Rainer
- 1038 Saffrich, Vladimir Benes, et al. 2008. “Replicative Senescence of Mesenchymal Stem
- 1039 Cells: A Continuous and Organized Process.” *PloS One* 3 (5): e2213.
- 1040 Walther, Tobias C., and Robert V. Farese Jr. 2012. “Lipid Droplets and Cellular Lipid
- 1041 Metabolism.” *Annual Review of Biochemistry* 81 (April): 687–714.
- 1042 Wellen, Kathryn E., Georgia Hatzivassiliou, Uma M. Sachdeva, Thi V. Bui, Justin R. Cross,
- 1043 and Craig B. Thompson. 2009. “ATP-Citrate Lyase Links Cellular Metabolism to Histone
- 1044 Acetylation.” *Science* 324 (5930): 1076–80.
- 1045 Zhou, Shuanhu, Joel S. Greenberger, Michael W. Epperly, Julie P. Goff, Carolyn Adler,
- 1046 Meryl S. Leboff, and Julie Glowacki. 2008. “Age-Related Intrinsic Changes in Human
- 1047 Bone-Marrow-Derived Mesenchymal Stem Cells and Their Differentiation to
- 1048 Osteoblasts.” *Aging Cell* 7 (3): 335–43.
- 1049 Zhou, Yingyao, Bin Zhou, Lars Pache, Max Chang, Alireza Hadj Khodabakhshi, Olga
- 1050 Tanaseichuk, Christopher Benner, and Sumit K. Chanda. 2019. “Metascape Provides a
- 1051 Biologist-Oriented Resource for the Analysis of Systems-Level Datasets.” *Nature*
- 1052 *Communications* 10 (1): 1523.
- 1053

1054 **SUPPLEMENTARY FIGURES**

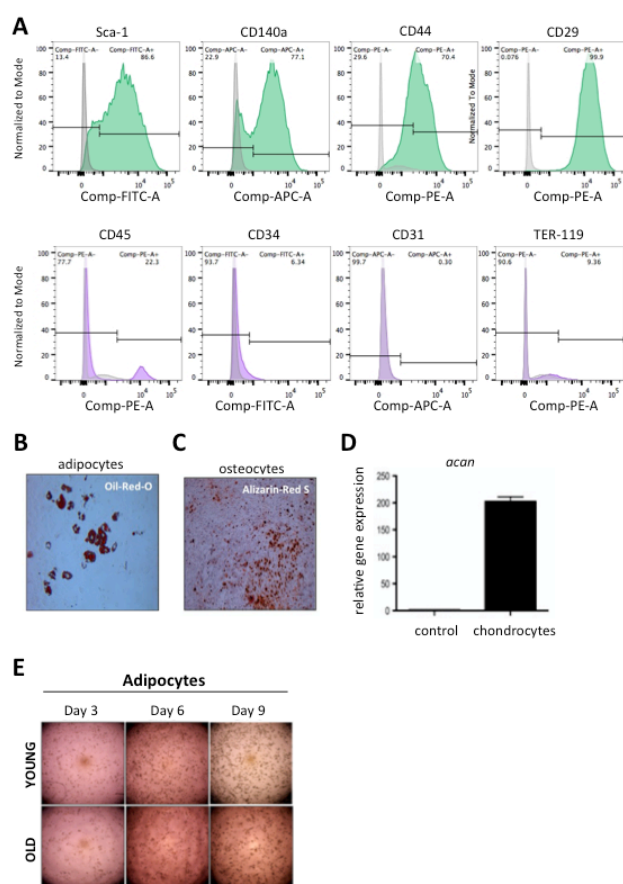

1055

1056 **Figure S1 (related to Figure 1)**

1057 **(A)** Expression profile of MSCs for mesenchymal (top) and hematopoietic (bottom) markers, as  
 1058 assessed by FACS analysis. Our purified MSCs population is enriched for mesenchymal stem cell  
 1059 markers and depleted for hematopoietic stem cell markers. **(B-D)** Multi-lineage differentiation capacity  
 1060 of MSCs. Representative images showing adipogenic and osteogenic potential, which were confirmed  
 1061 with Oil-Red-O and Alizarin-Red-S staining of MSCs, respectively. Images were acquired by bright-field  
 1062 microscopy, 12 days after induction of differentiation. Chondrogenic differentiation was confirmed by  
 1063 qPCR analysis of the chondrogenic gene *Acan*, 14 days after induction of differentiation and in  
 1064 comparison to non-induced cells.  $\beta$ -actin was used as an internal control for normalization (n=3  
 1065 biological replicates in each experiment). **(E)** Bright-field microscopy images of adipocytes in young and  
 1066 aged cells 3 days, 6 days and 9 days after induction of adipogenesis.

1067

1068

1069

1070

1071

1072

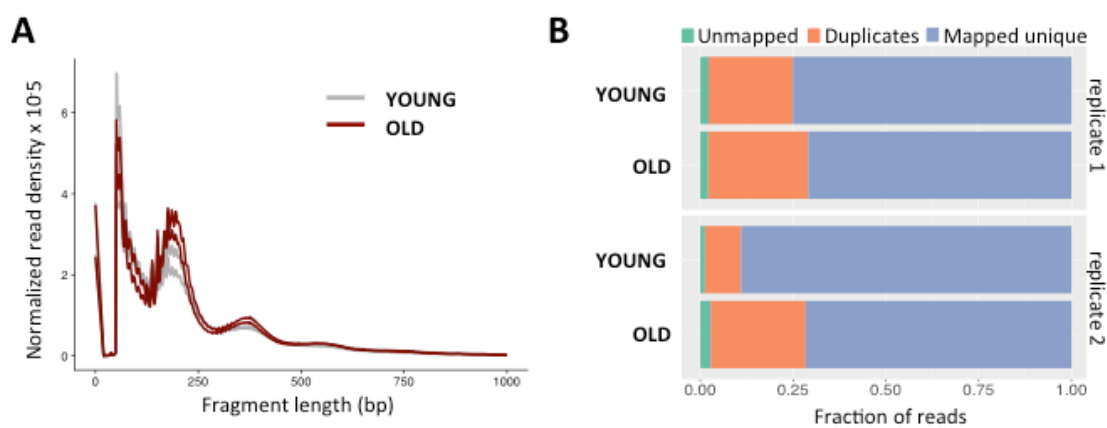

1073

1074 **Figure S2 (related to Figure 2)**

1075 Quality measures for ATAC-seq. **(A)** Insert size distribution of each of the four libraries (2 per age group)

1076 and **(B)** Mapping statistics.

1077

1078

1079

1080

1081

1082

1083

1084

1085

1086

1087

1088

1089

1090

1091

1092

1093



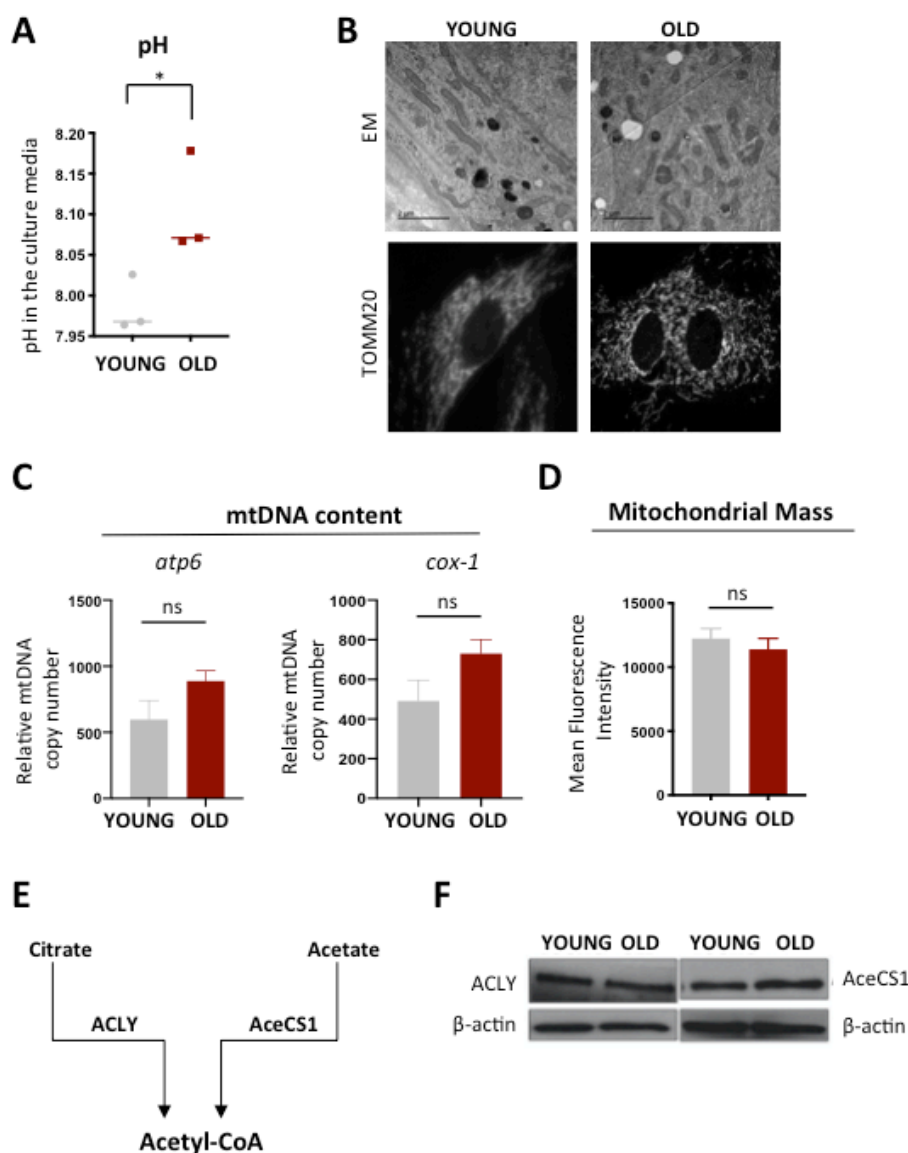

1094

1095 **Figure S3 (related to Figure 3)**

1096 **(A)** pH measurement of a-MEM media from young and aged cells, using the Vi-Cell MetaFLEX  
 1097 instrument; (n=3 biological replicates for each age group). **(B)** Representative images of mitochondria  
 1098 in young and aged cells. Images were acquired by electron microscopy (top) and by confocal  
 1099 microscopy, after staining of mitochondria with TOMM20 (bottom); (n=3 biological replicates for each  
 1100 age group). **(C)** Quantification of mtDNA content in young and aged cells by qPCR analysis of the  
 1101 expression levels of the mitochondrial-encoded *atp6* and *cox-1* genes. Expression levels of the nucleus-  
 1102 encoded  $\beta$ -actin was used as an internal control, for normalization; (n=3 biological replicates for each  
 1103 age group). **(D)** Mean Fluorescence Intensity of young and aged cells after staining with MitoTracker  
 1104 Deep Red FM dye. Analysis was performed by flow cytometry; (n=3 biological replicates for young mice;  
 1105 n=2 biological replicates for old mice). **(E and F)** Schematic graph showing the two major sources of  
 1106 acetyl-CoA and the respective enzymes, which catalyze this conversion. Representative immunoblots  
 1107 for these two enzymes in young and aged MSCs.  $\beta$ -actin was used as a loading control. Data are  
 1108 presented as mean  $\pm$  SEM. Statistical significance was determined using student's t-Test; \* p-value  
 1109 <0,05.

1110

1111

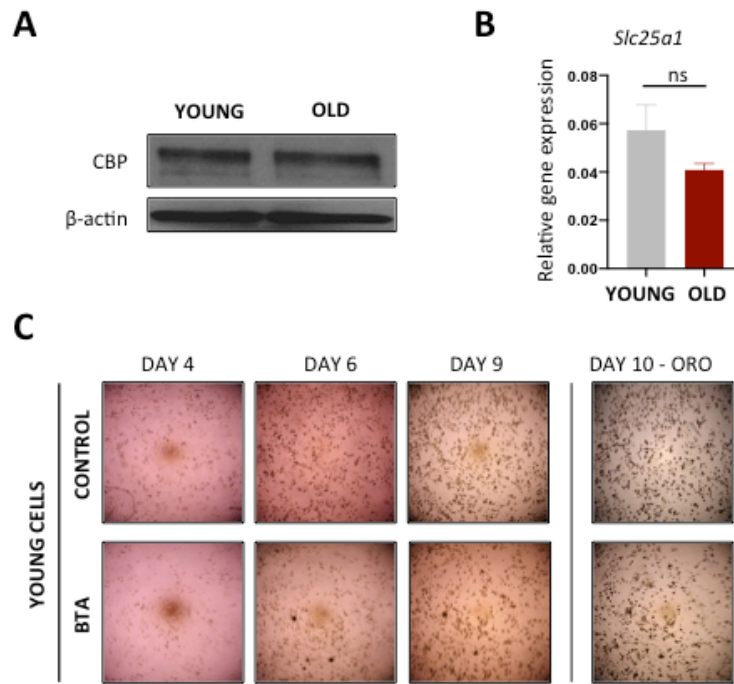

1112  
1113  
1114  
1115  
1116  
1117  
1118  
1119  
1120  
1121

**Figure S4 (related to Figure 4)**

(A) Representative immunoblots for the CBP histone acetyl-transferase in young and aged MSCs.  $\beta$ -actin was used as a loading control (n=2 for each age group). (B) qPCR analysis of the expression levels of the *Slc25a1* gene, which encodes the citrate carrier.  $\beta$ -actin expression levels were used as an internal control, for normalization; (n=3 biological replicates for young mice; n=2 biological replicates for old mice). (C) Representative images of adipocytes after 4 days, 6 days and 9 days of differentiation. Oil-Red-O staining performed on young MSCs, 10 days after induction of adipogenesis. Cells were treated with or without 1mM BTA during the adipogenic period (n=3 biological replicates for each group).

1122  
1123
